# Supplementary material for: AI (Artificial Intelligence)-Coupled Self-Calibrating SERS Spectroscopy for Robust Clinical Diagnosis of Diabetes and Associated Complications
Source: Research Square preprint supplement (doi:10.21203/rs.3.rs-6379475/v1), 2025-04-10
Supplement: Supplementary file 1 [file 19daee23929528ad8f3d542e.xlsx]

## Sheet: 正常人
检验号	登记号	姓名	性别	年龄	诊断结果
		容玉洁	F	28	ＴＣ:4.87ＴＧ:1.13ＬＤＬ:2.88ＨＤＬ:1.30ＵＡ:297ＧＬＵ:4.8
		方河丁	F	35	ＴＣ:4.91ＴＧ:0.82ＬＤＬ:2.82ＨＤＬ:1.42ＵＡ:341ＧＬＵ:4.8
		钟金香	F	39	ＴＣ:4.77ＴＧ:1.20ＬＤＬ:3.22ＨＤＬ:1.10ＵＡ:294ＧＬＵ:5.2
		杨丹	F	37	ＴＣ:3.89ＴＧ:0.55ＬＤＬ:2.12ＨＤＬ:1.28ＵＡ:263ＧＬＵ:4.9
		诸秋凤	F	59	ＴＣ:4.62ＴＧ:0.89ＬＤＬ:2.57ＨＤＬ:1.46ＵＡ:275ＧＬＵ:5.3
		张兴武	M	58	ＴＣ:4.36ＴＧ:0.77ＬＤＬ:2.53ＨＤＬ:1.25ＵＡ:423ＧＬＵ:5.2
		张馨元	F	33	ＴＣ:3.71ＴＧ:0.89ＬＤＬ:1.85ＨＤＬ:1.24ＵＡ:201ＧＬＵ:5.0
		吉瑶	F	34	ＴＣ:4.87ＴＧ:0.58ＬＤＬ:2.98ＨＤＬ:1.43ＵＡ:271ＧＬＵ:4.8
		张喜娜	F	30	ＴＣ:4.29ＴＧ:0.45ＬＤＬ:2.38ＨＤＬ:1.38ＵＡ:254ＧＬＵ:4.5
		余欣玥	F	17	ＴＣ:3.68ＴＧ:0.79ＬＤＬ:1.95ＨＤＬ:1.20ＵＡ:196ＧＬＵ:5.5
		周乐	F	25	ＴＣ:3.19ＴＧ:0.57ＬＤＬ:1.63ＨＤＬ:1.14ＵＡ:263ＧＬＵ:5.1
		王东宇	M	26	GLU:4.29 UA:346.0 CHOL:3.39 TG:1.00 HDL:1.39 LDL:1.46
		李远明	M	42	GLU:5.08 UA:387.2 CHOL:4.26 TG:1.69 HDL:1.16 LDL:2.34
		刘俊阳	F	25	GLU:5.11 UA:284.2 CHOL:4.63 TG:0.66 HDL:1.83 LDL:2.14
		程千惠	F	28	GLU:4.34 UA:352.4 CHOL:4.00 TG:0.59 HDL:1.55 LDL:1.93
		廖晨	F	26	GLU:4.18 UA:250.2 CHOL:3.91 TG:0.65 HDL:1.59 LDL:1.82
		陈卓妍	F	19	GLU:4.70 UA:258.4 CHOL:4.48 TG:0.59 HDL:1.81 LDL:2.09
		颜舒妮	F	33	GLU:5.13 UA:259.2 CHOL:3.99 TG:1.16 HDL:1.32 LDL:1.93
		梁荣柳	M	20	GLU:5.31 UA:388.7 CHOL:4.36 TG:0.61 HDL:1.71 LDL:1.93
		施余金	F	29	GLU:4.57 UA:257.0 CHOL:4.55 TG:0.49 HDL:1.69 LDL:2.37
		陈胜	M	35	GLU:5.04 UA:404.4 CHOL:4.73 TG:0.82 HDL:1.64 LDL:2.63
		陈湘广	M	20	GLU:4.50 UA:382.9 CHOL:4.80 TG:0.92 HDL:1.16 LDL:2.90
		阎莹	F	39	GLU:5.03 UA:328.5 CHOL:4.87 TG:0.60 HDL:1.54 LDL:2.69
		胡向宇	M	26	GLU:4.55 UA:303.2 CHOL:4.96 TG:0.81 HDL:1.56 LDL:2.61
		傅旋	F	24	GLU:4.39 UA:286.1 CHOL:5.12 TG:0.74 HDL:1.54 LDL:2.56
		匡静微	F	20	GLU:5.01 UA:339.6 CHOL:4.42 TG:0.83 HDL:1.28 LDL:2.72
		王志琼	F	34	GLU:5.05 UA:203.9 CHOL:4.97 TG:0.65 HDL:1.53 LDL:3.05
		陈兵文	M	34	GLU:5.89 UA:373.0 CHOL:5.23 TG:2.42 HDL:0.95 LDL:3.24
		彭穗云	F	28	GLU:5.41 UA:314.5 CHOL:4.44 TG:0.80 HDL:1.54 LDL:2.53
		王雨露	F	32	GLU: 3.97UA:244.8 CHOL: 3.82TG:1.07 HDL:1.56 LDL:1.53
		张亚生	M	39	GLU:4.52 UA:405.6 CHOL:5.11 TG:1.24 HDL:1.34 LDL:3.09
		陈江	M	20	GLU:5.03 UA:408.9 CHOL:4.37 TG:1.03 HDL:1.19 LDL:2.50
		何韵进	M	47	GLU:4.52 UA:409.2 CHOL:4.62 TG:1.13 HDL:1.46 LDL:2.56
		刘廷明	M	60	GLU:5.57 UA:227.7 CHOL:4.60 TG:1.05 HDL:1.51 LDL:2.45
		李晔强	M	36	GLU:4.69 UA:357.5 CHOL:4.56 TG:1.21 HDL:1.15 LDL:2.69
		叶海芳	M	42	GLU:4.76 UA:369.6 CHOL:5.08 TG:0.60 HDL:1.61 LDL:2.86
		毕颖	F	40	ＴＣ:3.99ＴＧ:0.54ＬＤＬ:1.75ＨＤＬ:1.48ＵＡ:321ＧＬＵ:4.0
		沙奕君	F	25	ＴＣ:4.36ＴＧ:0.59ＬＤＬ:2.65ＨＤＬ:1.28ＵＡ:287ＧＬＵ:4.3
		米娟	F	45	ＴＣ:4.49ＴＧ:0.79ＬＤＬ:2.8ＨＤＬ:1.17ＵＡ:342ＧＬＵ:4.6
		余略	M	36	ＴＣ:4.93ＴＧ:1.35ＬＤＬ:3.17ＨＤＬ:1.08ＵＡ:374ＧＬＵ:5.2
		陈静	F	24	ＴＣ:3.73ＴＧ:0.54ＬＤＬ:2.10ＨＤＬ:1.19ＵＡ:298ＧＬＵ:4.8
		祝艳	F	52	ＴＣ:4.29ＴＧ:1.13ＬＤＬ:2.88ＨＤＬ:1.20ＵＡ:253ＧＬＵ:5.3
		郑鸾娇	F	33	ＴＣ:3.84ＴＧ:0.71ＬＤＬ:2.31ＨＤＬ:1.10ＵＡ:248ＧＬＵ:4.7
		贾小霞	F	37	ＴＣ:3.82ＴＧ:0.79ＬＤＬ:2.09ＨＤＬ:1.24ＵＡ:209ＧＬＵ:4.7
		龙嘉怡	F	24	ＴＣ:3.96ＴＧ:0.84ＬＤＬ:2.21ＨＤＬ:1.22ＵＡ:343ＧＬＵ:4.9
		王子明	M	51	ＴＣ:4.51ＴＧ:0.77ＬＤＬ:2.87ＨＤＬ:1.09ＵＡ:325ＧＬＵ:5.1
		刘丹宁	F	30	ＴＣ:4.94ＴＧ:0.87ＬＤＬ:3.07ＨＤＬ:1.31ＵＡ:256ＧＬＵ:5.0
		卜净	F	40	ＴＣ:4.43ＴＧ:1.04ＬＤＬ:2.62ＨＤＬ:1.19ＵＡ:260ＧＬＵ:4.8
		师运	M	26	ＴＣ:3.47ＴＧ:0.54ＬＤＬ:1.94ＨＤＬ:1.05ＵＡ:341ＧＬＵ:4.5
		施苏	F	35	ＴＣ:4.65ＴＧ:0.59ＬＤＬ:2.70ＨＤＬ:1.42ＵＡ:291ＧＬＵ:4.7
		魏育民	M	48	ＴＣ:4.39ＴＧ:1.03ＬＤＬ:2.81ＨＤＬ:1.12ＵＡ:400ＧＬＵ:4.9
		曾素君	F	30	ＴＣ:4.68ＴＧ:0.64ＬＤＬ:3.23ＨＤＬ:1.12ＵＡ:250ＧＬＵ:4.7
		梁凤梅	F	40	ＴＣ:5.04ＴＧ:0.92ＬＤＬ:3.10ＨＤＬ:1.28ＵＡ:293ＧＬＵ:4.2
		傅文彦	F	35	ＴＣ:4.81ＴＧ:1.22ＬＤＬ:3.02ＨＤＬ:1.02ＵＡ:332ＧＬＵ:4.6
		林慧芳	F	47	TC:4.68TG:0.99LDL:2.61HDL:1.40UA:328GLU:5.7
		杨伯清	F	45	TC:4.8TG:1.54LDL:3.13HDL:1.07UA:334GLU:5.6
		万颖	F	35	TC:4.24TG:0.75LDL:2.491HDL:1.26UA:278GLU:4.5
		佟心	F	32	TC:4.65TG:0.81LDL:2.851HDL:1.38UA:283GLU:4.5
		张银华	F	41	TC:4.77TG:0.77LDL:2.951HDL:1.43UA:245GLU:4.8
		施征南	M	33	TC:4.42TG:0.83LDL:2.551HDL:1.4UA:350GLU:4.3
		王丹	M	43	TC:4.30TG:1.7LDL:2.531HDL:1.06UA:262GLU:4.6
		王玉龙	M	27	TC:4.39TG:0.74LDL:2.991HDL:1.05UA:346GLU:4.5
		苏莉	F	24	TC:4.04TG:0.89LDL:2.221HDL:1.31UA:310GLU:4.8
		刘健	M	31	TC:3.30TG:0.59UA:313GLU:5.2
		陈丽	F	41	TC:4.32TG1.22LDL:2.711HDL:1.081UA:285GLU:4.0
		王瑞琳	F	31	TC:4.13TG:0.54LDL:2.231HDL:1.431UA:236GLU:5.2
		林奕旋	F	27	TC:4.77TG:0.79LDL:3.191HDL:115UA:317GLU:4.5
		吕阮珠	F	35	TC:4.41TG:0.89LDL:2.821HDL:1.161UA:301GLU:4.5
		范莹莹	F	37	TC:3.98TG:0.66LDL:2.651HDL:1.021UA:266GLU:5.0
		叶珊	F	35	TC:4.98TG:0.79LDL:3.071HDL:1.401UA:253GLU:5.4
		刘玲卿	F	25	TC:34.95TG:0.47LDL3.031HDL:1.381UA:295GLU:4.6
		杜雪儿	F	24	TC:4.86TG:0.74LDL:3.101HDL:1.231UA:93GLU:4.8
		周敏华	F	37	TC:485TG:0.81LDL:2.681HDL:1.551UA:319GLU4.6
		郭汐岩	F	30	TC4.64TG:0.60LDL3.021HDL:1.151UA:302GLU:4.6
		孙婉珏	F	27	TC:4.85TG:0.66LDL:3.161HDL:1.251UA:90GLU:4.3
		马苏妍	F	28	TC:3.89TG:0.30LDL:2.27HDL:1.201UA:304GLU:4.7
		徐伟婷	F	28	TC4.92TG:0.50LDL:3.15HDL:1.301UA:241GLU:5.1
		黄晓欣	F	23	TC:5.15TG:0.72LDL3.37HDL:1.38UA:169GLU:4.9
		陈志强	M	45	TC:3.17TG:0.85LDL:1.64HDL:1.081UA:386.0GLU:4.3
		戴德义	M	73	TC:4.02TG:0.63LDL:2.65HDL:1.131UA:403.0GLU:4.6
		吴悠	M	26	TC:4.08TG:0.65LDL:2.51HDL:1.191UA:325.0GLU:4.4
		郑立庆	M	26	TC:3.73TG:0.68LDL:1.70HDL:1.51UA:338.0GLU:5.0
		肖健民	M	60	TC:5.02TG:1.57LDL:3.06HDL:1.12UA:355.0GLU:5.6
		陈子劲	M	55	TC:4.66TG:0.92LDL:3.12HDL:1.09UA:350.0GLU:4.8
		刘志勇	M	36	TC:4.49TG:0.79LDL:1.20HDL:2.84UA:426.0GLU:4.7
		张富祥	M	57	TC:4.56TG:0.89LDL:2.45HDL:1.401UA:407.0GLU:4.3
		代凌飞	M	40	TC:4.12TG:0.88LDL:2.39HDL:1.181UA:358.0GLU:4.8
		祝辉煌	M	20	TC:4.04TG:1.12LDL:2.24HDL:1.251UA:332.0GLU:4.7
		谢洪生	M	27	TC:4.66TG:0.52LDL:3.25HDL:1.23UA:332.0GLU:4.0
		陶春	M	33	TC:4.80TG:0.90LDL:3.02HDL:1.281UA:375.0GLU:4.7
		王世闰	M	27	TC:3.22TG:0.57LDL:1.81HDL:1.10UA:330.0GLU:4.2
		牛慧鑫	M	26	TC:4.86TG:0.88LDL:3.24HDL:1.321UA:412.0GLU:5.4
		文剑峰	M	52	TC:4.62TG:0.82LDL:2.80HDL:1.331UA:320.0GLU:5.7
		莫辉	M	49	TC:4.72TG:1.18LDL:3.18HDL:1.071UA:402.0GLU:5.6

## Sheet: T1DM
	糖尿病血浆标本信息
样本日期	序号	检验号	登记号	姓名	性别	年龄	科室	结果	诊断
10月14-20	67				F	21	内分泌科门诊	GLU:7.6 HbA1C:7.8 UA:326.0 CHOL:5.73 TG:0.59 HDL:1.62 LDL:3.37	1型糖尿病
12月5					M	50		GLU:8.8（餐后2h） HbA1C:6.8 UA:233.0 CHOL:2.75 TG:0.49 HDL:0.95 LDL:1.21	1型糖尿病型糖尿病,1型糖尿病伴有多个并发症,1型糖尿病伴有周围循环并发症,1型糖尿病性周围神经病,高血压2级,乙肝表面抗原携带者,甲状腺结节,骨质疏松,肺肿物
					F	29		GLU:6.7 HbA1C:7.1 UA:394（干式） CHOL:6.61 TG:1.22 HDL:1.51 LDL:3.94	1型糖尿病,1型糖尿病伴有神经并发症,1型糖尿病性肾病
					F	33			1型糖尿病,亚临床甲状腺功能减退,肝功能检查的异常结果
44905					F	26		GLU:7.4 HbA1C:5.5 UA:262.0 CHOL: TG: HDL: LDL:	32周,1型糖尿病,孕期补充
12月16					M	48		GLUI:11.9	1型糖尿病,1型糖尿病伴有多个并发症,1型糖尿病性肾病,1型糖尿病性周围神经病,慢性肾脏病2期,反流性食管炎,2019冠状病毒病,慢性胃炎,单纯性肾囊肿,脑缺血灶,1型糖尿病伴有周围循环并发症
12月18					F	46		GLU:5.3HbA1C:10.7%	1.糖尿病伴有酮症酸中毒 确诊2.糖尿病伴有酮症酸中毒 确诊3.乳房恶性肿瘤(术后) 确诊4.1型糖尿病伴有多个并发症 确诊5.2019冠状病毒病 确诊
12月26					F	30		GLU:10.3	糖尿病伴有酮症酸中毒,1型糖尿病伴有酮症酸中毒,2019冠状病毒病,低钾血症
12月30					M	35		GLU:6.1	1型糖尿病,2019冠状病毒病,慢性筛窦炎,慢性上颌窦炎,肺肿物,肝血管瘤,1型糖尿病伴有周围循环并发症
					F	27		GLU:5.1TC:6.25TG:0.53LDL:4.05HDL:1.72	1型糖尿病,高脂血症,关节痛
23年1.3					M	50		GLU:16.7 HbA1C:18.1 UA:380.0 CHOL:6.37 TG:1.31 HDL:0.69 LDL:4.60	1型糖尿病,2型糖尿病伴有周围循环并发症,高脂血症
					M	31		GLU:8.2	糖尿病伴有酮症酸中毒,1型糖尿病伴有酮症酸中毒,2019冠状病毒病,急性肾衰竭,1型糖尿病,高钾血症,甲状腺疾患，其他特指的
23.1.11					M	46		HbA1C:14.2%	1型糖尿病伴有酮症酸中毒,1型糖尿病伴有酮症酸中毒,1型糖尿病伴有多个并发症,1型糖尿病性周围神经病,1型糖尿病伴有周围循环并发症,胸腰椎椎间盘突出,慢性胃炎,胆囊息肉,前列腺钙化灶,腰椎退行性病变,全身性的动脉粥样硬化,病毒性肺炎,维生素D缺乏病,低钾血症
					F	73		GLU:12.9	1型糖尿病伴有多个并发症,1型糖尿病伴有周围循环并发症,1型糖尿病性周围神经病,高血压1级,基底动脉供血不足,脊椎病,咳嗽变异性哮喘,骨质疏松，其他的,乳腺纤维囊性增生,甲状腺结节,肝囊肿,肠其他特指的疾病,新型冠状病毒感染
					M	37		GLU7.0	1型糖尿病,病毒性肺炎,新型冠状病毒感染,1型糖尿病
					M	31		GLU:6.0TC:6.38TG:6.41	1型糖尿病伴有周围循环并发症,1型糖尿病性肾病,低钾性碱中毒,电解质代谢紊乱,病毒性肺炎,慢性肾脏病3期,肝血管瘤,1型糖尿病酮症,高脂血症,1型糖尿病伴有多个并发症,吉特尔曼综合征
23.1.19					F	51		GLU:6.9	1型糖尿病性周围神经病,1型糖尿病伴有周围循环并发症,1型糖尿病性视网膜病变,甲状腺结节,维生素D缺乏病
					M	38		GLU:12.2UA:429	1型糖尿病
23.1.31					F	26		GLU:3.9	孕产宫内孕38周,1型糖尿病
23.2.15	1				M	15			1型糖尿病,心悸,心血管性神经官能症
2023.2.17	1				F	72		GLU:14.7	1型糖尿病,空洞型肺结核,1型糖尿病,1型糖尿病性周围神经病,1型糖尿病性周围血管病变,糖尿病性视网膜病变,糖尿病性自主神经病,骨质疏松,甲状腺肿物,高血压
	2				F	73		GLU:14.7	感音神经性听觉丧失,1型糖尿病,基底动脉供血不足,脊椎病,咳嗽变异性哮喘,骨质疏松，其他的,乳腺纤维囊性增生,甲状腺结节,肝囊肿,肠其他特指的疾病,幽门螺旋杆菌感染,耳鸣,高血压
2023.2.24	3				F	50		GLU:14.6	1型糖尿病,白内障
	4				M	42		GLU:7.2	1型糖尿病,1型糖尿病性周围血管病变,肾结石
2023.2.27	5				F	24		GLU:5.2	低血糖,1型糖尿病,中度贫血
2023.3.25	113				M	43		GLU:2.9 HbA1C:9.9 UA:403.0 CHOL:4.43 TG:1.11 HDL:1.48 LDL:2.19	1型糖尿病
2023.3.29	124				F	7		GLU: HbA1C:7.1 UA:208（干式） CHOL:4.91 TG:1.27 HDL:1.44 LDL:2.61	急性扁桃体炎,1型糖尿病
	125				F	27		GLU:11.2（餐后2h） HbA1C:8.5 UA:153.0 CHOL:3.26 TG:0.54 HDL:0.96 LDL:1.73	糖尿病,1型糖尿病,甲状腺功能减退症,妊娠合并糖尿病
2023.4.411	126				M	38		GLU:7.4 HbA1C:11.1%UA:526CHOL:4.45 TG:1.55 HDL:1.24 LDL:2.28	1自身免疫多内分泌腺病综合征 2、 1型糖尿病 3、 慢性淋巴细胞性甲状腺炎
	127				F	30		GLU:8.6 HbA1C: UA:259 CHOL: TG: HDL: LDL:	1型糖尿病,1型糖尿病伴有酮症酸中毒,急性胃肠炎,脂肪肝,高脂血症,轻度贫血
2023.4.15	128				F	34		GLU: HbA1C: UA: CHOL: TG: HDL: LDL:	28周,1型糖尿病
	129				M	38		GLU: HbA1C: UA: CHOL: TG: HDL: LDL:	1型糖尿病性视网膜病变,1型糖尿病
2023.4.20	150				F	70		GLU:11.7 HbA1C:12.8 UA: CHOL:5.59 TG:2.59 HDL:0.89 LDL:2.56	1型糖尿病,原发性高血压,冠状动脉粥样硬化性心脏病,1型糖尿病肾病IV期
	152				M	36		GLU: HbA9C: UA: CHOL: TG: HDL: LDL:	1型糖尿病,自身免疫性多内分泌腺病综合征,1型糖尿病,自身免疫性甲状腺炎,高尿酸血症,糖尿病伴有周围循环并发症,前列腺增生
2023.4.23	154				F	25		GLU:8.1 HbA1C:6.7 UA:361 CHOL:4.66 TG:0.72 HDL:1.68 LDL:2.41	1型糖尿病
2023.4.26	159				M	48		GLU: HbA1C: UA:403 CHOL: TG: HDL: LDL:	1型糖尿病,呼吸道感染
2023.4.28	161				M	22		GLU:15.2 HbA1C:10.2 UA:321 CHOL:4.4 TG:1.19 HDL:1.40 LDL:2.48	1型糖尿病
	162				M	29		GLU:6.9 HbA1C:6.7 UA:285 CHOL:4.95 TG:0.53 HDL:1.33 LDL:3.12	1型糖尿病
	163				F	28		GLU:5.7 HbA1C:5.8 UA:234 CHOL:4.63 TG:0.87 HDL:1.37 LDL:2.65	1型糖尿病
2023.5.5	164				F			GLU:11.3 HbA1C: UA:523 CHOL:4.53 TG:1.56 HDL:1.04 LDL:2.64	1型糖尿病性周围神经病
2023.5.11	165				F	52		GLU:8.3	糖尿病性缺血性黄斑病性视网膜病,糖尿病性视网膜病变,视网膜出血,人工晶体植入术后,1型糖尿病
	166				F	49		GLU:6.9HbA1C:7.5	1型糖尿病
2023.5.23	167				F	30		HbA1C:9.1 CHOL:6.02 TG:2.02 HDL:1.04LDL:4.37	1型糖尿病,亚临床甲状腺功能减退,高脂血症
	168				F	34		Glu:9.6HbA1C:6.0	1型糖尿病,亚临床甲状腺功能减退,肝功能检查的异常结果

## Sheet: 妊娠期糖尿病
	糖尿病血浆标本信息
样本日期	序号	检验号	登记号	姓名	性别	年龄	科室	结果	诊断
2022-10-13	14				女	26	产科门诊	GLU:5.3 HbA1C:5.0 UA:190.0 CHOL: TG: HDL: LDL:	32周,妊娠期糖尿病,孕期补充,维生素D缺乏病
	18				女	26	产科门诊	GLU:5.0 HbA1C:5.4 UA:248.0 CHOL: TG: HDL: LDL:	30周,妊娠期糖尿病
	20				女	34	产科	GLU:3.7 HbA1C: UA:291.0 CHOL:5.74 TG:4.33 HDL:1.17 LDL:2.71	妊娠期糖尿病,与妊娠有关的情况,妊娠合并巨大儿
	27				女	27	产科门诊	GLU:6.0 HbA1C:5.9 UA:313.0 CHOL:7.28 TG:1.87 HDL:1.56 LDL:4.98	妊娠期糖尿病,32周
	34				女	32	产科	GLU:4.5 HbA1C:5.4 UA:221.0 CHOL:7.59 TG:4.86 HDL:1.36 LDL:4.21	妊娠期糖尿病,链球菌感染,与妊娠有关的情况
	38				女	36	产科	GLU:5.6 HbA1C:5.8 UA:270.0 CHOL:6.21 TG:1.84 HDL:1.26 LDL:4.13	妊娠期糖尿病,与妊娠有关的情况,乙肝表面抗原携带者
10月14-20	1				女	29	产科	GLU:4.2 HbA1C: UA:576.0 CHOL:4.28 TG:2.53 HDL:0.99 LDL:2.34	妊娠期糖尿病,产程和分娩并发胎儿的应激反应,妊娠37整周或以后的假临产,与妊娠有关的情况
	15				女	28	产科门诊	GLU:5.4 HbA1C:5.2 UA:224.0 CHOL: TG: HDL: LDL:	32周,妊娠期糖尿病
	35				女	27	内分泌科	GLU:4.9 HbA1C: UA: CHOL: TG: HDL: LDL:	妊娠期糖尿病
44888					女	27		GLU:4.3 HbA1C:5.5 UA:415.0 CHOL:5.11 TG:2.28 HDL:1.33 LDL:2.44	胎膜早破,妊娠期糖尿病,乙肝表面抗原携带者,妊娠37整周或以后的假临产,球拍状胎盘
					女	29		GLU:4.7 HbA1C:5.3 UA:282.0 CHOL:6.04 TG:2.66 HDL:1.37 LDL:3.68	妊娠合并子宫瘢痕,妊娠期糖尿病,与妊娠有关的情况
					女	34		GLU:4.7 HbA1C:5.3 UA:418.0 CHOL:4.69 TG:2.58 HDL:1.31 LDL:2.05	胎膜早破,妊娠37整周或以后的假临产,妊娠期糖尿病,妊娠合并地中海贫血,球拍状胎盘
44889					女	35		GLU:5.2 HbA1C:5.1 UA:367.0 CHOL: TG: HDL: LDL:	34周,妊娠期糖尿病
44891					女	32		GLU:4.5 HbA1C: UA:230.0 CHOL:6.20 TG:3.64 HDL:1.12 LDL:3.34	妊娠期糖尿病,与妊娠有关的情况
					女	36		GLU:6.0 HbA1C:5.4 UA:332.0 CHOL:5.27 TG:3.66 HDL:1.11 LDL:2.89	妊娠期糖尿病,与妊娠有关的情况,高龄初孕妇的监督
					女	34		GLU:4.3 HbA1C: UA:266.0 CHOL:5.13 TG:3.40 HDL:1.33 LDL:2.41	妊娠期糖尿病,与妊娠有关的情况
44890					女	34		GLU:5.4 HbA1C: UA:326.0 CHOL:6.01 TG:3.16 HDL:1.10 LDL:3.69	胎膜早破,与妊娠有关的情况,妊娠期糖尿病,妊娠合并地中海贫血
					女	38		GLU:4.8 HbA1C:5.4 UA: CHOL:6.30 TG:4.33 HDL:1.22 LDL:2.82	子痫,妊娠期糖尿病,链球菌感染,帆状胎盘,高龄初孕妇的监督,与妊娠有关的情况,妊娠合并子宫瘢痕
					女	26		GLU:5.6 HbA1C:5.9 UA:353.0 CHOL:6.45 TG:2.27 HDL:1.08 LDL:4.15	胎膜早破,妊娠37整周或以后的假临产,妊娠期糖尿病,与妊娠有关的情况,妊娠合并地中海贫血
					女	32		GLU:4.7 HbA1C:5.2 UA:294.0 CHOL:5.88 TG:3.02 HDL:1.18 LDL:3.35	妊娠期糖尿病,与妊娠有关的情况,妊娠合并子宫体肿瘤
					女	36		GLU:3.9 HbA1C:5.4 UA:323.0 CHOL:7.32 TG:2.63 HDL:1.57 LDL:4.62	妊娠期糖尿病,与妊娠有关的情况
					女	26		GLU:4.2 HbA1C:5.2 UA:340.0 CHOL:5.51 TG:2.41 HDL:0.97 LDL:3.48	妊娠37整周或以后的假临产,妊娠期糖尿病,与妊娠有关的情况
					女	29		GLU:4.7 HbA1C: UA: CHOL: TG: HDL: LDL:	32周,妊娠合并糖尿病
					女	28		GLU:5.2 HbA1C:4.9 UA:265.0 CHOL: TG: HDL: LDL:	妊娠期糖尿病,32周
44892					女	32		GLU:4.1 HbA1C:4.9 UA:349.0 CHOL:5.83 TG:3.39 HDL:1.19 LDL:2.86	妊娠期糖尿病,与妊娠有关的情况,产程和分娩并发其他脐带缠绕
					女	30		GLU:4.5 HbA1C:4.9 UA:279.0 CHOL: TG: HDL: LDL:	30周,妊娠期糖尿病
					女	28		GLU:4.3 HbA1C:5.4 UA:273.0 CHOL: TG: HDL: LDL:	34周,妊娠期糖尿病
23.2.15	2				女	36		GLU:5.1TG:5.3	妊娠期糖尿病
	3				女	33		GLU:7.5TC:8.0TG:3.18HDL:1.67LDL:5.36	胎儿宫内窘迫,妊娠合并子宫瘢痕,妊娠期糖尿病,孕35周
	4				女	28		GLU:5.4TC:5.69TG:2.28	妊娠期糖尿病,32周
	5				女	34		GLU:4.4TC:5.65TG:1.99	妊娠合并子宫瘢痕,胎膜早破,先兆临产,孕37周,妊娠期糖尿病,妊娠合并子宫瘢痕,胎膜早破,妊娠期糖尿病,分娩时Ⅰ度会阴裂伤,轻度贫血,头位顺产,单一活产,孕37周,以前剖宫产术后的阴道分娩
	6				女	41		GLU:4.3TC:6.07TG:4.39UA:503	妊娠合并子宫瘢痕,胎膜早破,先兆临产,孕37周,妊娠期糖尿病,高龄经产妇妊娠监督,妊娠合并子宫瘢痕,胎膜早破,妊娠期糖尿病,高龄经产妇妊娠监督,孕37周,经剖宫产术分娩,单一活产,经剖宫产术分娩,臀先露
	7				女	32		GLU:4.8TG:1.86UA:382	妊娠合并子宫瘢痕,妊娠期糖尿病,孕39周,胎儿宫内窘迫,妊娠期糖尿病,妊娠合并子宫瘢痕,经剖宫产术分娩,孕39周,单一活产,经剖宫产术分娩
	8				女	29		GLU:5.4TC:5.31TG:3.46	胎儿宫内窘迫,妊娠期糖尿病,孕2产0宫内孕38周+4天左枕前单活胎,孕38周,B 族链球菌作为分类于其他章疾病的原因
	9				女	32		GLU:5.0TG:2.64	妊娠期糖尿病,脐带缠绕,孕40周
	10				女	29		GLU:5.1TC:7.96TG:3.25LDL:4.14HDL:2.06	先兆临产,妊娠期糖尿病,妊娠合并血小板减少,妊娠合并中度贫血
	11				女	36		GLU:4.9	孕产宫内孕36周,妊娠期糖尿病
	12				女	41		GLU:4.8TC:6.54TG:3.4LDL:3.69	妊娠合并子宫瘢痕,妊娠期糖尿病,高龄经产妇妊娠监督,孕39周,三尖瓣关闭不全,妊娠合并肺动脉高压,心功能Ⅱ级
	13				女	39		GLU:4.0TC:8.22TG:3.73LDL:5.04	妊娠期糖尿病,妊娠合并甲状腺功能减退,孕39周,高龄初孕妇的监督
	14				女	32		GLU:4.7	28周,妊娠期糖尿病,脾肾两虚证
	15				女	34		GLU:4.1UA:432	孕产宫内孕37周,妊娠期糖尿病
	16				女	32		GLU:4.4	28周,妊娠期糖尿病
	17				女	36		GLU:5.6	孕产宫内孕37周,妊娠合并糖尿病,高龄经产妇妊娠监督,维生素D缺乏病
2023.4.418	133				女	36		GLU: HbA1C: UA: CHOL:5.50 TG:1.93 HDL:3.3 LDL:1.28	先兆早产,臀先露,妊娠期糖尿病,妊娠合并甲状腺功能减退,高龄经产妇妊娠监督,妊娠合并子宫瘢痕,妊娠合并地中海贫血
	134				女	29		GLU:5.2 HbA1C: UA:379 CHOL:7.92 TG:5.45 HDL:1.4 LDL:4.28	先兆临产,妊娠期糖尿病,妊娠合并血小板减少,妊娠合并中度贫血
	135				女	36		GLU: HbA1C:5.9% UA:418 CHOL:6.82 TG:2.56 HDL:1.49 LDL:4.07	妊娠合并子宫瘢痕,先兆临产,高龄经产妇妊娠监督,妊娠期糖尿病,宫颈息肉,头位顺产,宫缩乏力
	136				女	27		GLU:4.4 HbA1C:5.5% UA:422 CHOL:6.31 TG:2.18 HDL:1.71 LDL:3.86	先兆临产,妊娠期糖尿病,孕37周
	141				女	35		GLU:HbA1C:6.1 UA: CHOL: TG: HDL: LDL:	妊娠期糖尿病
2023.8.9	202				女	41		Ｇlu:4.2	孕产宫内孕38周,大脑神经胶质瘤病,妊娠期糖尿病
	209				女	37		Ｇlu:4.4HbA1C:5.6UA:316CHOL:6.081TG:3.92 HDL:1.49LDL:3.35	妊娠期糖尿病,妊娠合并甲状腺功能减退,B 族链球菌作为分类于其他章疾病的原因,妊娠合并巨大儿,孕39周,Gitelman综合征,高龄经产妇妊娠监督
	215				女	30		Ｇlu:4.6	32周,妊娠合并糖尿病,便秘,维生素D缺乏病
	216				女	28		Ｇlu:4.5HbA1C:5.8UA:289CHOL:6.13TG:4.41 HDL:1.36LDL:3.42	妊娠期糖尿病,孕39周,妊娠合并甲状腺功能亢进,B 族链球菌作为分类于其他章疾病的原因,α型地中海贫血
2023.8.10	218				女	38		Ｇlu:4.6	妊娠合并子宫瘢痕,高龄经产妇妊娠监督,妊娠合并子宫肌瘤,妊娠期糖尿病,先兆临产
	223				女	29		Ｇlu:4.5	孕产宫内孕37周,妊娠期糖尿病,妊娠合并子宫肌瘤,肥胖症
2023.8.15	231				女	41		GLU:4.3 HbA1C:5.6	孕产宫内孕38周,瘢痕子宫,妊娠期糖尿病,妊娠合并甲状腺功能减退
	243				女	32		GLU:3.3	孕产宫内孕39周,妊娠期糖尿病,瘢痕子宫
	244				女	29		GLU:4.8 HbA1C:5.8	孕产宫内孕40周,妊娠期糖尿病
2023.8.17	245				女	31		GLU:4.0 HbA1C:5.1 UA:404 CHOL:8.75 TG:5.19 HDL:1.03 LDL:5.91	胎膜早破,妊娠期糖尿病,先兆临产,孕38周
	248				女	30		Ｇlu:4.4HbA1C:4.8UA:342CHOL:4.26TG:2.2 HDL:1.24LDL:2.15	孕39周,孕39周,妊娠期糖尿病
	252				女	38		Ｇlu:4.3UA:352CHOL:6.53TG:2.15HDL:1.44LDL:4.16	妊娠期糖尿病,羊水过少,孕39周,妊娠合并地中海贫血
	255				女	30		Ｇlu:4.5UA:366CHOL:7.48TG:2.84 HDL:1.48LDL:4.62	孕31周,妊娠期糖尿病,完全性前置胎盘伴出血
	258				女	37		Ｇlu:4.8	28周,妊娠期糖尿病,妊娠合并慢性高血压,瘢痕子宫
	265				女	40		Ｇlu:3.9	妊娠期糖尿病,先兆临产
	267				女	33		Ｇlu:4.2HbA1C:4.6	32周,妊娠期糖尿病
2023.9.6	284				女	34		Ｇlu:5.4	28周,妊娠期糖尿病,前置胎盘
	288				女	38		Ｇlu:6.3	妊娠合并糖尿病
	291				女	27		Ｇlu:3.9	28周,妊娠期糖尿病,贫血
	296				女	36		Ｇlu:4.8	32周,妊娠期糖尿病
	297				女	26		Ｇlu:4.0HbA1C:5.3	胎膜早破,先兆临产,孕36周,妊娠期糖尿病,蚕豆病
	299				女	30		Ｇlu:4.1	孕39周,妊娠期糖尿病,宫缩乏力
2023.9.8	313				女	33		GLU:4.5 HbA1C:5.4	34周,妊娠期糖尿病
	320				女	37		GLU:3.9	先兆临产,妊娠期糖尿病,孕39周,高龄经产妇妊娠监督
	324				女	29		GLU:6.6 HbA1C:5.8	妊娠合并糖尿病
2023.9.11	334				女	34		Ｇlu:5.4	先兆早产,孕32周,妊娠合并子宫瘢痕,妊娠期糖尿病,妊娠合并地中海贫血
	338				女	34		GLU:3.7	前置胎盘伴出血,孕26周,妊娠期糖尿病,胚胎移植术后
2023.9.11	343				女	33		GLU:4.2	34周,妊娠合并糖尿病
2023.9.15	349				女	33		GLU:3.2 HbA1C:4.5	双胎妊娠,胚胎移植术后,妊娠期糖尿病,妊娠合并甲状腺功能减退,孕37周,臀先露

## Sheet: T2DM
	糖尿病血浆标本信息
样本日期	序号	检验号	登记号	姓名	性别	年龄	科室	结果	诊断
2022-10-07	7				男	46岁	内分泌科门诊	GLU:6.6 HbA1C:5.9 UA:262.0 CHOL:3.45 TG:0.63 HDL:1.31 LDL:1.59	糖代谢紊乱,高脂血症,痛风
2022-10-07	13				男	53	心血管内科	GLU:7.3 HbA1C:7.2 UA:317.0 CHOL:3.46 TG:1.10 HDL:0.81 LDL:2.04	冠状动脉粥样硬化
2022-10-07	30				女	60	心血管内科	GLU:7.2 HbA1C: UA:329.0 CHOL:4.23 TG:1.62 HDL:0.92 LDL:2.47	冠状动脉粥样硬化,高脂血症
2022-10-10	1				男	54	内分泌科门诊	GLU:10.1 HbA1C:7.5 UA:414.0 CHOL:4.83 TG:1.29 HDL:0.86 LDL:3.37	2型糖尿病情况的观疾病和情况的观
2022-10-10	21				男	61	心血管内科	GLU:5.6 HbA1C:6.4 UA:401.0 CHOL:3.17 TG:0.67 HDL:0.87 LDL:1.72	冠状动脉粥样硬化性心脏病,2型糖尿病
2022-10-10	31				男	56	健康管理科门诊	GLU:8.1 HbA1C:7.0 UA:368.0 CHOL:3.65 TG:1.00 HDL:1.18 LDL:1.84	2型糖尿病,高脂血症,颈动脉硬化,重度骨质疏松
2022-10-10	35				男	59	内分泌科	GLU:15.1 HbA1C:10.9 UA:319.0 CHOL:3.85 TG:0.68 HDL:0.62 LDL:2.90	2型糖尿病
2022-10-10	36				男	64	心血管内科	GLU:6.4 HbA1C: UA:241.0 CHOL:3.57 TG:0.74 HDL:1.19 LDL:1.81	高脂血症,原发性高血压,动脉的动脉粥样硬化，其他的,糖尿病
2022-10-10	37				男	56	健康管理科门诊	GLU:8.5 HbA1C:6.9 UA:156.0 CHOL:3.35 TG:1.57 HDL:0.83 LDL:1.65	原发性高血压,混合性高脂血症,2型糖尿病伴有并发症,颈椎病,便秘,急性上呼吸道感染
2022-10-10	38				男	55	内分泌科门诊	GLU:7.5 HbA1C:6.6 UA:350.0 CHOL:4.50 TG:0.91 HDL:0.76 LDL:3.25	2型糖尿病,原发性高血压
2022-10-10	39				女	39	心血管内科	GLU:7.2 HbA1C:6.7 UA:205.0 CHOL:3.95 TG:0.79 HDL:1.19 LDL:2.34	高血压2级,高脂血症,2型糖尿病
2022-10-10	41				男	64	心血管内科（	GLU:6.1 HbA1C:6.2 UA:383.0 CHOL:2.89 TG:1.01 HDL:0.78 LDL:1.58	原发性高血压,高脂血症,2型糖尿病,慢性肾功能不全,高尿酸血症,肝功能检查的异常结果
2022-10-10	42				女	55	康复医学科门诊	GLU:7.4 HbA1C:6.5 UA:258.0 CHOL:4.08 TG:1.33 HDL:0.80 LDL:2.45	右,肱骨外上髁炎,脑梗死后遗症,右侧,偏瘫,2型糖尿病伴有神经的并发症,原发性高血压
2022-10-10	56				男	59	内分泌科	GLU:9.2（餐后2h） HbA1C:8.9 UA:391.0 CHOL:3.98 TG:0.99 HDL:1.06 LDL:2.35	2型糖尿病伴有多个并发症
2022-10-10	57				男	49	内分泌科	GLU: HbA1C:7.7 UA:328.0 CHOL:4.18 TG:0.98 HDL:0.93 LDL:2.91	2型糖尿病伴有多个并发症
2022-10-10	63				男	52	心血管内科	GLU:8.4 HbA1C:6.7 UA:408.0 CHOL:2.98 TG:1.38 HDL:0.64 LDL:1.82	冠状动脉性心脏病,糖尿病不伴有并发症,高尿酸血症,颈动脉硬化
2022-10-10	64				女	55	内分泌科门诊	GLU:6.1 HbA1C:6.0 UA:266.0 CHOL:4.40 TG:0.77 HDL:1.28 LDL:2.48	2型糖尿病性肾病,高脂血症
2022-10-10	66				女	48	内分泌科门诊	GLU:5.1 HbA1C:5.7 UA:226.0 CHOL:4.89 TG:1.06 HDL:1.19 LDL:2.83	2型糖尿病,原发性高血压
2022-10-10	67				男	55	内分泌科门诊	GLU:7.9 HbA1C:7.0 UA:362.0 CHOL:2.74 TG:1.08 HDL:0.65 LDL:1.58	2型糖尿病,高脂血症,甲状腺功能减退症,维生素缺乏病,干眼症
2022-10-10	69				男	46	心血管内科	GLU:10.3 HbA1C:10.6 UA:307.0 CHOL:3.63 TG:1.18 HDL:0.79 LDL:2.13	原发性高血压,冠状动脉粥样硬化,慢性肾脏病3期,2型糖尿病
2022-10-10	70				男	68	内分泌科门诊	GLU:7.7 HbA1C:9.1 UA:348.0 CHOL:4.29 TG:0.78 HDL:0.91 LDL:3.03	糖尿病伴有并发症,原发性高血压,冠状动脉粥样硬化性心脏病
2022-10-10	72				女	66	健康管理科门诊	GLU:8.7 HbA1C:7.3 UA:249.0 CHOL:3.61 TG:1.31 HDL:0.89 LDL:2.02	2型糖尿病,原发性高血压,高脂血症,低钾血症,颈动脉硬化,骨质疏松,失眠
2022-10-10	73				女	50	健康管理科门诊	GLU:7.2 HbA1C:6.6 UA:293.0 CHOL:4.93 TG:2.25 HDL:0.95 LDL:3.30	胸闷,2型糖尿病
2022-10-13	6				男	47	内分泌科	GLU:7.6（餐后2h） HbA1C:5.9 UA:292.0 CHOL:3.67 TG:0.35 HDL:0.84 LDL:2.43	2型糖尿病
2022-10-13	7				女	61	内分泌科门诊	GLU:8.4 HbA1C:9.1 UA:235.0 CHOL:3.14 TG:1.09 HDL:1.09 LDL:1.46	2型糖尿病性周围神经病,原发性高血压,高脂血症
2022-10-13	10				女	59	心血管内科	GLU:7.2 HbA1C: UA:203.0 CHOL:3.23 TG:0.89 HDL:1.18 LDL:1.27	高脂血症,冠状动脉粥样硬化性心脏病,糖尿病,糜烂性胃炎
2022-10-13	23				男	56	内分泌科门诊	GLU:8.4 HbA1C:6.5 UA:400.0 CHOL:4.04 TG:1.65 HDL:0.71 LDL:2.62	2型糖尿病,慢性肾脏病3期
2022-10-13	47				女	74	心血管内科	GLU:8.1 HbA1C:6.5 UA:256.0 CHOL:3.90 TG:0.90 HDL:1.41 LDL:1.90	糖尿病
2022-10-13	51				女	50	内分泌科门诊	GLU:6.3 HbA1C:6.2 UA:256.0 CHOL:4.66 TG:1.19 HDL:1.10 LDL:2.87	2型糖尿病性周围神经病
2022-10-13	55				女	30	内分泌科门诊	GLU:6.6 HbA1C: UA:176.0 CHOL:3.21 TG:0.54 HDL:0.98 LDL:1.76	糖尿病不伴有并发症,高脂血症,高尿酸血症
10月14-20	14				男	72	肾内科	GLU:8.3 HbA1C:6.6 UA:292.0 CHOL:3.12 TG:0.63 HDL:0.83 LDL:1.82	2型糖尿病,原发性高血压
10月14-20	26				男	74	内分泌科门诊	GLU:9.7（餐后2h） HbA1C:6.9 UA:424.0 CHOL:2.64 TG:0.97 HDL:0.70 LDL:1.25	2型糖尿病,原发性高血压
10月14-20	29				女	56	内分泌科门诊	GLU:7.1 HbA1C:6.0 UA:278.0 CHOL:3.98 TG:0.44 HDL:1.63 LDL:1.59	2型糖尿病,高脂血症
10月14-20	34				女	51	内分泌科门诊	GLU:4.3（餐后2h） HbA1C:6.6 UA:239.0 CHOL:3.09 TG:0.74 HDL:1.04 LDL:1.59	2型糖尿病
10月14-20	36				女	53	内分泌科	GLU:14.6 HbA1C:10.8 UA:306.0 CHOL:2.08 TG:0.54 HDL:0.73 LDL:1.03	糖尿病
10月14-20	45				男	54	内分泌科	GLU:15.5（餐后2h） HbA1C:9.5 UA:353.0 CHOL:4.68 TG:0.58 HDL:1.17 LDL:3.12	2型糖尿病
10月14-20	50				男	67	内分泌科门诊	GLU:7.0 HbA1C:6.6 UA:375.0 CHOL:4.36 TG:0.48 HDL:1.46 LDL:2.36	2型糖尿病,高脂血症,原发性高血压
10月14-20	55				男	68	内分泌科	GLU:10.2 （餐后2h）HbA1C:10.9 UA:298.0 CHOL:3.58 TG:0.98 HDL:0.68 LDL:2.46	2型糖尿病
10月14-20	59				男	53	内分泌科	GLU: HbA1C:8.4 UA:389.0 CHOL:4.32 TG:1.17 HDL:0.92 LDL:2.75	2型糖尿病
10月14-20	65				男	38	感染肝病门诊	GLU:7.0 HbA1C:7.0 UA:237.0 CHOL:4.49 TG:0.68 HDL:1.25 LDL:2.91	2型糖尿病,肝功能检查的异常结果,高脂血症
2022-11-23					男	49		GLU:6.9 HbA1C:5.5 UA:292.0 CHOL:3.31 TG:0.43 HDL:1.07 LDL:1.67	2型糖尿病,感音神经性听觉丧失,湿疹,肝功能检查的异常结果,2型糖尿病伴有周围循环并发症,骨密度和结构其他特指的疾患
2022-11-23					男	39		GLU:11.7 HbA1C:11.1 UA:337.0 CHOL:4.34 TG:1.60 HDL:0.77 LDL:3.13	2型糖尿病
44891					男	36		GLU:7.9 HbA1C:10.6 UA:318.0 CHOL:3.21 TG:1.31 HDL:0.72 LDL:1.85	2型糖尿病,2型糖尿病伴有多个并发症,低钾血症,高血压1级,非酒精性脂肪性肝炎,2型糖尿病伴有周围循环并发症,2型糖尿病性视网膜病变
2023.3.4	8				男	80		GLU:12.7（餐后2h） HbA1C:6.3 UA:379.0 CHOL:4.30 TG:0.96 HDL:0.91 LDL:3.00	2型糖尿病,2型糖尿病伴有周围循环并发症,冠状动脉肌桥,2型糖尿病伴有多个并发症,2型糖尿病性周围神经病,病态窦房结综合征,阵发性心房颤动,高血压病2级（极高危）,强直性脊柱炎,前列腺增生,骨密度和结构其他特指的疾患,肾结石,单纯性肾囊肿,低钾血症,银屑病
2023.3.4	12				男	53		GLU: HbA1C:7.7 UA:218.0 CHOL:3.54 TG:0.60 HDL:1.17 LDL:1.89	2型糖尿病,2型糖尿病,胸腰椎间盘变性,颈内动脉粥样硬化,下肢动脉粥样硬化,心律失常,胆囊息肉,焦虑状态
2023.3.4	13				男	63		GLU:16.1 HbA1C:8.7 UA:278.0 CHOL:2.60 TG:1.00 HDL:0.62 LDL:1.48	2型糖尿病,高血压1级,高脂血症2型糖尿病,高血压1级,高脂血症,2型糖尿病伴有多个并发症,糖尿病伴有周围循环并发症,2型糖尿病性周围神经病,高血压病1级（极高危）,脂肪肝,肺肿物,冠状动脉粥样硬化,感音神经性听觉丧失
2023.3.4	15				男	64		GLU:7.5 HbA1C:12.3 UA:186.0 CHOL:3.36 TG:0.84 HDL:0.78 LDL:2.06	2型糖尿病,头晕,2型糖尿病伴有多个并发症,2型糖尿病伴有周围循环并发症,2型糖尿病性周围神经病,腔隙性脑梗死,肺肿物,肝内胆管结石,肝囊肿,支气管扩张(症),肺气肿,颈内动脉瘤
2023.3.4	23				男	60		GLU:14.5 HbA1C:8.8 UA:368.0 CHOL:3.34 TG:0.71 HDL:0.96 LDL:1.89	2型糖尿病2型糖尿病,2型糖尿病伴有多个并发症,2型糖尿病性视网膜病变,2型糖尿病性周围神经病,2型糖尿病伴有周围循环并发症,肝囊肿,单纯性肾囊肿,主动脉的动脉粥样硬化,肺部感染,中央型房间隔缺损(卵圆孔型)
2023.3.4	25				男	45		GLU:6.7 HbA1C: UA:414.0 CHOL:3.06 TG:1.66 HDL:0.83 LDL:1.54	2型糖尿病,动脉粥样硬化
2023.3.16	42				男	69		GLU:7.5 HbA1C:6.3 UA:356.0 CHOL:2.79 TG:0.92 HDL:0.84 LDL:1.34	高同型半胱氨酸血症,高血压2级,动脉的动脉粥样硬化，其他的,糖尿病,慢性肾脏病3期,肺肾两虚证,焦虑状态,可疑疾病和情况的观察
2023.3.16	49				女	51		GLU:5.8 HbA1C: UA:341.0 CHOL:4.59 TG:1.30 HDL:1.15 LDL:2.69	2型糖尿病,高脂血症,非酒精性脂肪性肝炎
2023.3.16	51				男	66		GLU:6.9 HbA1C:6.9 UA:362.0 CHOL:2.49 TG:0.24 HDL:0.92 LDL:1.19	冠状动脉粥样硬化性心脏病,原发性高血压,糖尿病,慢性肾脏病3期,肺肾两虚证,高同型半胱氨酸血症
2023.3.16	54				男	41		GLU:7.3 HbA1C:6.4 UA:394.0 CHOL:2.54 TG:0.77 HDL:0.75 LDL:1.27	高血压,动脉的动脉粥样硬化，其他的,高同型半胱氨酸血症,糖尿病,高黏滞血症,瘀血痹阻证
2023.3.16	57				女	73		GLU:5.9 HbA1C:6.2 UA:301.0 CHOL:3.67 TG:1.17 HDL:1.16 LDL:1.76	甲状腺功能减退症,高脂血症,原发性高血压,颈动脉硬化,2型糖尿病,重度骨质疏松
2023.3.16	59				男	77		GLU:7.1 HbA1C:7.7 UA:340.0 CHOL:2.86 TG:1.43 HDL:0.73 LDL:1.38	糖尿病伴有多个并发症
2023.3.16	60				男	78		GLU:6.6 HbA1C:6.1 UA:366.0 CHOL:3.35 TG:0.51 HDL:0.93 LDL:1.90	2型糖尿病,高脂血症,颈动脉硬化,维生素D缺乏病,高尿酸血症
3023.3.21	72				男	59		GLU:7.8 HbA1C:6.1 UA:264 CHOL:4.30 TG:1.56 HDL:0.93 LDL:2.78	高尿酸血症,原发性高血压,冠状动脉粥样硬化,扩张型心肌病,动脉的动脉粥样硬化，其他的,糖尿病,心力衰竭
3023.3.21	78				男	71		GLU:10.1 HbA1C:7.0 UA:378.0 CHOL:4.83 TG:0.73 HDL:1.23 LDL:3.16	冠状动脉粥样硬化性心脏病,2型糖尿病
3023.3.21	80				男	35		GLU:5.7 HbA1C:9.9 UA:299.0 CHOL:2.11 TG:0.80 HDL:0.71 LDL:0.87	2型糖尿病,高脂血症,痛风
3023.3.21	82				男	52		GLU:5.8 HbA1C:6.9 UA:422.0 CHOL:2.44 TG:1.58 HDL:0.65 LDL:0.98	2型糖尿病
3023.3.21	91				女	57		GLU:7.7 HbA1C: UA:346.0 CHOL:3.35 TG:1.01 HDL:1.31 LDL:1.41	2型糖尿病,高脂血症,高尿酸血症
3023.3.21	94				女	76		GLU:16.5 HbA1C:12.8 UA:228.0 CHOL:3.30 TG:0.67 HDL:1.40 LDL:1.24	肢体麻木,糖尿病,原发性高血压,颈内动脉粥样硬化,血瘀证,气阴两虚证
2023.3.23	98				男	75		GLU:11.2 HbA1C:8.0 UA:256.0 CHOL:4.91 TG:0.43 HDL:1.78 LDL:2.40	2型糖尿病,高脂血症,颈动脉硬化,维生素D缺乏病,高尿酸血症
2023.3.23	105				女	73		GLU:7.2 HbA1C:6.3 UA:214.0 CHOL:4.63 TG:0.84 HDL:1.43 LDL:2.41	冠状动脉粥样硬化性心脏病,原发性高血压,糖尿病伴有并发症
2023.3.23	111				女	64		GLU:5.4 HbA1C:6.6 UA:191.0 CHOL:4.14 TG:0.47 HDL:1.66 LDL:1.80	高脂血症,2型糖尿病
2023.3.23	112				男	48		GLU:7.3 HbA1C: UA:422.0 CHOL:3.33 TG:1.18 HDL:0.98 LDL:1.63	高脂血症,原发性高血压,前壁急性透壁性心肌梗死,2型糖尿病
2023.3.25	114				女	52		GLU:7.4 HbA1C:8.6 UA:244.0 CHOL:2.68 TG:0.79 HDL:0.87 LDL:1.23	高脂血症,2型糖尿病,冠状动脉肌桥
2023.3.29	123				女	57		GLU:6.3 HbA1C:6.2 UA:308.0 CHOL:3.21 TG:1.16 HDL:0.83 LDL:1.77	糖尿病伴有多个并发症,高脂血症,睡眠障碍,原发性高血压
2022-10-10	16				男	66	心血管内科（	GLU:8.3 HbA1C:6.8 UA:396.1 CHOL:3.57 TG:1.37 HDL:0.63 LDL:2.26	冠状动脉粥样硬化性心脏病,慢性肾脏病2期,原发性高血压,糖尿病
2022-10-10	17				男	72	肾内科	GLU:6.2 HbA1C:6.0 UA:355.0 CHOL:4.55 TG:1.09 HDL:1.18 LDL:2.45	原发性高血压,慢性肾炎综合征,2型糖尿病
2022-10-10	27				男	66	心血管内科	GLU:8.8 HbA1C: UA:301.0 CHOL:4.99 TG:1.17 HDL:1.21 LDL:3.23	2型糖尿病,脑梗死
2022-10-10	44				男	49	内分泌科门诊	GLU:6.9 HbA1C:6.4 UA:379.0 CHOL:4.90 TG:1.45 HDL:1.33 LDL:2.87	2型糖尿病,高脂血症
2022-10-10	50				男	68	胃肠外科	GLU:10.8 HbA1C: UA:122.0 CHOL:4.90 TG:1.45 HDL:1.33 LDL:2.87	2型糖尿病,特发性(原发性)高血压,冠状动脉性心脏病
2022-10-10	62				男	52	肾内科	GLU:5.2 HbA1C:6.2 UA:258.0 CHOL:3.44 TG:1.38 HDL:0.88 LDL:1.49	慢性肾脏病4期,2型糖尿病,糖尿病并肾脏疾病,高血压3级,意义未明的单克隆丙种球蛋白病
2022-10-13	26				女	74	内分泌科门诊	GLU:7.76 HbA1C: UA:290.0 CHOL:3.80 TG:1.60 HDL:0.81 LDL:1.99	2型糖尿病伴有多个并发症,脑梗死后遗症,冠状动脉粥样硬化性心脏病
2022-10-13	28				男	45	内分泌科门诊	GLU:10.0 HbA1C:6.6 UA:335.4 CHOL:2.25 TG:0.72 HDL:1.18 LDL:0.78	2型糖尿病,甲状腺功能亢进症
10月14-20	8				女	66	肝胆胰腺外科	GLU:8.6 HbA1C: UA:227.4 CHOL:4.32 TG:1.24 HDL:1.04 LDL:2.26	2型糖尿病,腰椎间盘突出,胆囊结石伴有急性胆囊炎
10月14-20	11				女	55	内分泌科门诊	9.8GLU:6.5 HbA1C: UA:237.4 CHOL:3.33 TG:1.41 HDL:0.71 LDL:1.32	2型糖尿病
2023.4.418	142				男	29		GLU:5.9HbA1C:6.4 UA:242 CHOL:2.71 TG:0.9 HDL:0.73 LDL:1.46	2型糖尿病,高脂血症,高尿酸血症,原发性高血压,肝功能检查的异常结果
2023.7.26	194				女	58		Ｇlu:8.1HbA1C:8.3UA:278CHOL:3.83TG:0.94 HDL:0.83LDL:2.58	2型糖尿病,高脂血症,原发性高血压
	197				男	66		Ｇlu:7.4HbA1C:7.8UA:279CHOL:4.59TG:1.67 HDL:1.18LDL:2.78	2型糖尿病,高脂血症,腔隙性脑梗死,冠状动脉粥样硬化
2023.8.9	207				男	44		Ｇlu:8.0HbA1C:7.5UA:378CHOL:2.87TG:1.30 HDL:0.83LDL:1.44	高脂血症,原发性高血压,冠状动脉粥样硬化性心脏病,糖尿病,颈动脉硬化,气滞血瘀证
2023.8.10	219				女	54		Ｇlu:9.6HbA1C:8.1UA:232CHOL:3.17TG:1.03 HDL:1.28LDL:1.07	高尿酸血症,睡眠障碍,原发性高血压,冠状动脉粥样硬化性心脏病,糖尿病
	220				男	65		Ｇlu:7.8HbA1C:7.8UA:414CHOL:3.20TG:1.48HDL:0.73LDL:1.88	2型糖尿病,原发性高血压,高脂血症
	221				男	55		Ｇlu:5.5HbA1C:6.9UA:413CHOL:2.74TG:1.23HDL:0.58LDL:1.63	2型糖尿病,冠状动脉粥样硬化性心脏病,高脂血症,高尿酸血症,颈动脉硬化
	224				女	69		Ｇlu:10.5HbA1C:10.6UA:239CHOL:2.2TG:0.95 HDL:0.55LDL:1.18	高脂血症,原发性高血压,动脉的动脉粥样硬化，其他的,冠状动脉粥样硬化,糖尿病
	226				男	67		Ｇlu:6.0HbA1C:8.0UA:133CHOL:3.62TG:1.63 HDL:1.23LDL:1.65	2型糖尿病,高脂血症,冠状动脉粥样硬化性心脏病,颈动脉硬化,高尿酸血症
	227				男	50		Ｇlu:5.2HbA1C:9.2UA:239CHOL:3.42TG:0.85 HDL:1.1LDL:1.65	2型糖尿病,高脂血症,心动过速
	228				男	61		Ｇlu:5.3HbA1C:6.1UA:416CHOL:3.92TG:1.42 HDL:0.73LDL:2.63	高尿酸血症,原发性高血压,冠状动脉粥样硬化性心脏病,2型糖尿病
2023.8.15	233				男	60		GLU:6.6 HbA1C:7.3 UA:222 CHOL:3.89 TG: 2.46HDL:0.66 LDL:2.12	1、2型糖尿病周围神经病变 2、高脂血症 3、直肠息肉切除术后
	239				男	34		GLU:6.0 HbA1C:6.6 UA:383 CHOL:3.72 TG:1.56 HDL:0.92 LDL:2.45	2型糖尿病,高脂血症,痛风
	240				男	55		GLU:6.3 HbA1C:6.4 UA:226 CHOL:3.53 TG:1.04 HDL:0.97 LDL:1.96	高脂血症,高尿酸血症,原发性高血压,动脉的动脉粥样硬化，其他的,蛋白尿,糖尿病,肝功能不全
	242				男	56		GLU:6.0 HbA1C:6.5 UA:387 CHOL:3.6 TG:1.36 HDL:1.13 LDL:1.87	2型糖尿病,高脂血症,颈动脉硬化,原发性高血压
2023.8.17	260				男	57		Ｇlu:4.1HbA1C:6.3UA:290CHOL:4.16TG:0.52 HDL:1.12LDL:2.63	糖尿病伴有并发症,高脂血症
	264				男	45		Ｇlu:6.4HbA1C:6.3UA:373CHOL:2.93TG:0.66 HDL:0.86LDL:1.5	2型糖尿病,高尿酸血症,高脂血症
	268				男	72		Ｇlu:6.1HbA1C:6.7UA:355CHOL:3.45TG:0.93 HDL:0.9LDL:2.21	高脂血症,2型糖尿病,高同型半胱氨酸血症,冠状动脉粥样硬化,高黏滞血症,原发性高血压
2023.8.25	272				男	76		GLU:8.3 HbA1C:6.9 UA:417 CHOL:3.6 TG:0.98 HDL:0.95 LDL:2.19	高脂血症,颈动脉硬化,糖尿病
	274				男	56		GLU:5.2 HbA1C:6.2 UA:329 CHOL:3.77 TG:0.6 HDL:1.12 LDL:2.12	2型糖尿病,高脂血症,瘀血阻络证
	275				男	54		GLU:9.1 HbA1C:15.9 UA:305 CHOL:4.52 TG:1.12 HDL:0.72 LDL:3.2	2型糖尿病
	282				女	65		Ｇlu:7.2UA:313CHOL:3.51TG:1.31 HDL:1.1LDL:1.9	2型糖尿病,腰痛,高脂血症
2023.9.6	287				男	34		Ｇlu:4.8HbA1C:6.9UA:284CHOL:4.15TG:1.34 HDL:0.66LDL:3.19	2型糖尿病,2型糖尿病性肾病,高脂血症,维生素D缺乏病,原发性高血压
2023.9.8	323				男			GLU:8.6 HbA1C:8.2 UA:366 CHOL:3.8 TG:0.86 HDL:1.09 LDL:2.07	2型糖尿病,高脂血症
2023.9.11	347				女	57		GLU:6.9 HbA1C:9.8 UA:249 CHOL:4.28 TG:1.17 HDL:1.4 LDL:2.12	高脂血症,睡眠障碍,动脉的动脉粥样硬化，其他的,糖尿病,高黏滞血症,血瘀络滞证,心气虚证,冠状动脉粥样硬化

## Sheet: T2DM+高尿酸血症
	糖尿病血浆标本信息
样本日期	序号	检验号	登记号	姓名	性别	年龄	科室	结果	诊断
2022-10-10	19				男	57	门诊	GLU:7.0 HbA1C: UA:434.0 CHOL:4.14 TG:1.50 HDL:0.87 LDL:2.51	冠状动脉粥样硬化性心脏病,原发性高血压,2型糖尿病,高尿酸血症,肾积水伴肾结石
2022-10-10	22				男	53	心血管内科	GLU:6.8 HbA1C:5.6 UA:452.0 CHOL:4.67 TG:1.44 HDL:1.23 LDL:2.75	冠状动脉粥样硬化性心脏病,2型糖尿病,高尿酸血症,泌尿道感染
2022-10-10	53				男	49	内分泌科	GLU:6.2 HbA1C:11.5 UA:553.0 CHOL:4.37 TG:0.85 HDL:0.88 LDL:2.87	2型糖尿病性酮症酸中毒
2022-10-10	60				男	51	急诊内科	GLU:10.1 HbA1C:7.3 UA:543 CHOL:4.91 TG:1.43 HDL:0.88 LDL:3.30	2型糖尿病
2022-10-13	2				女	73	内分泌科	GLU:3.5 HbA1C:7.7 UA:405.0 CHOL:2.57 TG:0.89 HDL:0.68 LDL:1.29	2型糖尿病
2022-10-13	29				男	44	内分泌科门诊	GLU:6.9（餐后2h） HbA1C:6.7 UA:604.0 CHOL:2.44 TG:0.72 HDL:0.73 LDL:1.32	2型糖尿病
2022-10-13	42				女	69	内分泌科门诊	GLU:9.7 HbA1C:8.2 UA:649.0 CHOL:3.28 TG:0.97 HDL:0.78 LDL:2.23	2型糖尿病,肺结节性质待查,原发性高血压,高脂血症,冠状动脉粥样硬化性心脏病
10月14-20	9				女	73	内分泌科门诊	GLU:3.5 HbA1C:7.7 UA:405.0 CHOL:2.57 TG:0.89 HDL:0.68 LDL:1.29	2型糖尿病
10月14-20	20				男	33	内分泌科门诊	GLU:5.2 HbA1C:6.1 UA:485.0 CHOL:4.09 TG:0.56 HDL:1.28 LDL:2.24	糖尿病,高脂血症
10月14-20	25				男	60	内分泌科	GLU:6.8（餐后2h） HbA1C:6.7 UA:523.0 CHOL:2.42 TG:1.25 HDL:0.79 LDL:1.13	2型糖尿病
10月14-20	52				女	61	健康管理科门诊	GLU:5.9 HbA1C:6.8 UA:390.0 CHOL:3.73 TG:1.67 HDL:0.79 LDL:2.17	2型糖尿病
10月14-20	66				男	47	心血管内科	GLU:7.8 HbA1C:6.6 UA:450.0 CHOL:4.57 TG:1.60 HDL:0.98 LDL:2.91	糖尿病伴有多个并发症,高脂血症,高血压3级,蛋白尿
44891					男	40		GLU:9.7 HbA1C:10.3 UA:468.0 CHOL:4.81 TG:1.44 HDL:0.77 LDL:3.34	2型糖尿病,2型糖尿病伴有周围循环并发症,高脂血症,非酒精性脂肪性肝炎,冠状动脉粥样硬化,脊椎病,大隐静脉曲张,前列腺钙化灶,高尿酸血症不伴有感染性关节炎体征和砂砾性病
2023.3.4	9				男	40		GLU:13.0 HbA1C:12.6 UA:532.0 CHOL:4.27 TG:1.38 HDL:1.41 LDL:1.88	2型糖尿病1、2型糖尿病性酮症 2、急性胃炎
2023.3.4	14				女	46		GLU: HbA1C: UA:414.0 CHOL:4.25 TG:0.33 HDL:1.38 LDL:2.11	2型糖尿病,2型糖尿病伴有周围循环并发症,慢性乙型病毒性肝炎,低钾血症,高脂血症,无症状性菌尿
2023.3.4	19				男	29		GLU:7.9 HbA1C:7.5 UA:500.0 CHOL:3.43 TG:0.95 HDL:0.88 LDL:2.00	2型糖尿病,肝功能检查的异常结果,脂肪肝
2023.3.13	27				女	66		GLU:9.7 HbA1C: UA:513.0 CHOL:4.09 TG:1.36 HDL:0.67 LDL:2.83	原发性高血压,糖尿病,动脉的动脉粥样硬化，其他的,高同型半胱氨酸血症,高尿酸血症,肺肾两虚证,慢性肾脏病2期
2023.3.13	31				男	32		GLU:4.5 HbA1C:6.3 UA:441.0 CHOL:3.61 TG:0.93 HDL:0.84 LDL:2.50	2型糖尿病,原发性高血压,高尿酸血症
2023.3.16	40				女	48		GLU:7.1 HbA1C:7.6 UA:378.0 CHOL:3.25 TG:1.40 HDL:0.90 LDL:1.86	2型糖尿病,原发性高血压,高脂血症,维生素D缺乏病
2023.3.16	43				男	57		GLU:6.6 HbA1C:6.8 UA:461.0 CHOL:2.99 TG:1.61 HDL:0.72 LDL:1.63	2型糖尿病,高脂血症,颈动脉硬化,维生素D缺乏病,高尿酸血症
2023.3.16	45				男	58		GLU:6.1 HbA1C:6.7 UA:442.0 CHOL:3.62 TG:1.66 HDL:0.63 LDL:2.13	2型糖尿病,高脂血症
3023.3.21	87				女	82		GLU:7.8 HbA1C:8.0 UA:578.0 CHOL:4.25 TG:1.35 HDL:0.93 LDL:2.35	后循环缺血,2型糖尿病伴有多个并发症,慢性肾脏病3期
2023.3.23	97				男	67		GLU:7.3 HbA1C: UA:431.0 CHOL:2.84 TG:0.97 HDL:0.73 LDL:1.61	原发性高血压,动脉的动脉粥样硬化，其他的,糖尿病
2022-10-10	12				女	72	老年医学科	GLU: HbA1C:7.1 UA:445.9 CHOL:2.48 TG:1.04 HDL:1.14 LDL:0.60	呼吸困难,特发性(原发性)高血压,2型糖尿病
2022-10-10	15				女	65	泌尿外科	GLU:7.1 HbA1C:6.5 UA:344.0 CHOL: 3.22TG:1.27 HDL:1.12 LDL:1.0	输尿管结石,泌尿道感染,肾周脓肿,单纯性肾囊肿,高血压3级,2型糖尿病
2022-10-10	26				女	26	内分泌科门诊	GLU:8.5 HbA1C: UA:452.5 CHOL:3.86 TG:0.95 HDL:0.96 LDL:2.37	2型糖尿病
2022-10-13	1				男	67	整形美容烧伤	GLU:6.3 HbA1C:5.9 UA:533.0 CHOL:2.48 TG:1.4 HDL:0.65 LDL:0.94	2型糖尿病性溃疡
2022-10-13	12				男	39	心血管内科（门诊医疗）	GLU:6.2 HbA1C:6.4 UA:466.6 CHOL:3.72 TG:1.15 HDL:0.61 LDL:2.78	原发性高血压,2型糖尿病,腔隙性脑梗死,高脂血症,颈椎病
2023.4.418	138				男	35		GLU:7.9 HbA1C:6.3 UA:715 CHOL:3.99 TG:1.25 HDL:0.8 LDL:2.75	2型糖尿病,高尿酸血症
2023.4.23	155				男	59		GLU:6.1 HbA1C:6.4 UA:564 CHOL:2.77 TG:1.4 HDL:0.78 LDL:1.26	原发性高血压,2型糖尿病性肾病,腔隙性脑梗死,高同型半胱氨酸血症,肺肾两虚证,高尿酸血症,高黏滞血症,蛋白尿
	157				女	48		GLU:6.6 HbA1C:6.6 UA:537 CHOL:3.86 TG:1.42 HDL:1.08 LDL:2.17	高脂血症,高尿酸血症,缺氧缺血性脑病,原发性高血压,2型糖尿病,高黏滞血症,血瘀络滞证,心气虚证
2023.8.9	214				女	53		Ｇlu:6.0HbA1C:6.6UA:484CHOL:3.92TG:1.08 HDL:0.9LDL:2.54	2型糖尿病,高脂血症
2023.8.15	237				男	46		GLU:5.0 HbA1C:6.3 UA:440 CHOL:2.93 TG:0.99 HDL:0.97 LDL:1.40	高同型半胱氨酸血症,高脂血症,原发性高血压,动脉的动脉粥样硬化，其他的,消化性溃疡,糖尿病
2023.8.17	246				男	52		Ｇlu:6.3HbA1C:5.5UA:462CHOL:3.18TG:1.62 HDL:0.77LDL:1.84	2型糖尿病,原发性高血压,高脂血症,高尿酸血症,维生素D缺乏病,急性支气管炎,失眠
	254				男	45		Ｇlu:7.5HbA1C:6.9UA:466CHOL:3.46TG:1.3 HDL:0.7LDL:2.16	高脂血症,高尿酸血症,慢性胃炎,冠状动脉支架植入后状态,慢性肾功能不全,糖尿病,肺肾两虚证,肝功能不全
2023.8.25	277				男	50		GLU:5.9 HbA1C:7.7 UA:471 CHOL:2.76 TG:1.1 HDL:1.07 LDL:0.86	2型糖尿病,高脂血症,颈动脉硬化,维生素D缺乏病,高尿酸血症
	279				女	37		Ｇlu:4.9HbA1C:5.6UA:453CHOL:4.27TG:0.86 HDL:1.09LDL:2.17	2型糖尿病,高脂血症,高尿酸血症
2023.9.6	283				女	53		GLU:7.6 HbA1C: UA:426 CHOL:4.01 TG:1.51 HDL:1.0 LDL:2.19	原发性高血压,2型糖尿病,高脂血症,泌尿道感染,高尿酸血症,高黏滞血症,慢性肾功能不全,肺肾两虚证,气滞血瘀证
	300				男	45		Ｇlu:6.3HbA1C:6.6UA:481CHOL:3.19TG:1.14 HDL:0.92LDL:1.62	高脂血症,高尿酸血症,原发性高血压,慢性肾脏病2期,糖尿病,颈动脉硬化,肺肾两虚证
2023.9.8	318				女	43		GLU:6.8 HbA1C:7.9 UA:404 CHOL:4.37 TG:1.33 HDL:1.09 LDL:2.65	2型糖尿病,原发性高血压,高脂血症,高尿酸血症,甲状腺结节
	330				男	50		GLU:7.3 HbA1C: UA:511 CHOL:3.13 TG:1.15 HDL:0.96 LDL:1.76	原发性高血压,冠状动脉粥样硬化,2型糖尿病,高尿酸血症
	332				女	67		GLU:5.6 HbA1C:6.5 UA:485 CHOL:3.34 TG:1.05 HDL:0.7 LDL:1.93	2型糖尿病,高脂血症,原发性高血压,失眠
2023.9.15	348				男	39		GLU:6.0 HbA1C:6.5 UA:458 CHOL:4.27 TG:0.68 HDL:1.28 LDL:2.59	手术后胰腺外分泌功能不全,乙肝表面抗原携带者,1型糖尿病
	350				男	57		Ｇlu:5.1HbA1C:7.4UA:446CHOL:3.47TG:1.2 HDL:0.65LDL:2.27	原发性高血压,冠状动脉粥样硬化性心脏病,2型糖尿病,高尿酸血症

## Sheet: T2DM+高脂血症
	糖尿病血浆标本信息
样本日期	序号	检验号	登记号	姓名	性别	年龄	科室	结果	诊断
2022-10-07	3				男	50	内分泌科门诊	GLU:7.8 HbA1C:7.2 UA:310.0 CHOL:4.70 TG:1.86 HDL:0.99 LDL:2.76	可疑疾病和情况的观察
2022-10-10	29				男	37	健康管理科门诊	GLU:13.1 HbA1C:10.4 UA:404.0 CHOL:6.04 TG:2.64 HDL:0.97 LDL:3.76	2型糖尿病
2022-10-10	34				男	59	内分泌科	GLU:16.4 HbA1C: UA:241.0 CHOL:4.04 TG:3.96 HDL:0.60 LDL:1.62	2型糖尿病
2022-10-10	40				男	35	内分泌科门诊	GLU:7 HbA1C: UA:296.0 CHOL:5.93 TG:4.36 HDL:0.57 LDL:3.99	2型糖尿病,高脂血症,脂肪肝,痛风,甲状腺功能减退症
2022-10-10	45				男	42	心血管内科	GLU:16.0 HbA1C:10.1 UA:343.0 CHOL:12.39 TG:26.65 HDL:0.65 LDL:1.60	糖尿病
2022-10-10	51				男	54	内分泌科	GLU:6.7 HbA1C:7.2 UA:423.0 CHOL:4.31 TG:2.84 HDL:0.66 LDL:2.28	2型糖尿病
2022-10-10	52				女	65	内分泌科	GLU:10.0 HbA1C:10.0 UA:211.0 CHOL:5.64 TG:2.02 HDL:0.78 LDL:4.04	2型糖尿病
2022-10-10	55				男	49	内分泌科	GLU:11.9（餐后2h） HbA1C:8.1 UA:309.0 CHOL:4.56 TG:0.84 HDL:0.78 LDL:3.56	2型糖尿病
2022-10-10	59				男	71	疼痛科门诊	GLU:9.6 HbA1C:7.3 UA:420.0 CHOL:4.11 TG:5.94 HDL:0.68 LDL:1.29	2型糖尿病伴有肾的并发症,原发性高血压,冠状动脉粥样硬化性心脏病,高脂血症,肾小动脉硬化症,慢性肾脏病3期,高尿酸血症,肘关节痛
2022-10-10	65				男	62	心血管内科	GLU:6.7 HbA1C:6.7 UA:321.0 CHOL:4.64 TG:2.51 HDL:0.64 LDL:3.12	冠状动脉支架植入后状态,2型糖尿病,高脂血症
2022-10-13	4				女	55	内分泌科	GLU:8.3 HbA1C:7.8 UA:341.0 CHOL:5.13 TG:2.98 HDL:0.73 LDL:2.98	2型糖尿病
2022-10-13	15				男	48	内分泌科门诊	GLU:6.1 HbA1C:6.2 UA:423.0 CHOL:5.43 TG:3.89 HDL:0.71 LDL:3.00	高脂血症,2型糖尿病
2022-10-13	16				男	59	内分泌科门诊	GLU:6.2 HbA1C:6.9 UA:343.0 CHOL:5.50 TG:1.21 HDL:0.84 LDL:3.87	2型糖尿病
2022-10-13	17				男	37	健康管理科门诊	17.9GLU:13.1 HbA1C:10.4 UA:404.0 CHOL:6.04 TG:2.64 HDL:0.97 LDL:3.76	2型糖尿病
2022-10-13	21				女	54	内分泌科门诊	GLU:8.7 HbA1C:8.6 UA:224.0 CHOL:6.77 TG:0.99 HDL:1.66 LDL:4.30	2型糖尿病
2022-10-13	25				男	50	内分泌科门诊	GLU:7.5 HbA1C:6.5 UA:409.0 CHOL:5.79 TG:1.79 HDL:1.79 LDL:3.67	2型糖尿病,高脂血症
2022-10-13	37				女	67	内分泌科门诊	GLU:11.0（餐后2h） HbA1C:9.1 UA:303.0 CHOL:4.91 TG:0.78 HDL:0.93 LDL:3.51	2型糖尿病
2022-10-13	39				男	38	内分泌科门诊	GLU:6.3（餐后2h） HbA1C:6.1 UA:410.0 CHOL:4.76 TG:5.04 HDL:0.44 LDL:2.27	2型糖尿病
2022-10-13	43				男	38	内分泌科门诊	GLU:16.7 HbA1C:11.1 UA:412.0 CHOL:6.06 TG:5.64 HDL:0.72 LDL:3.31	2型糖尿病
2022-10-13	46				男	41	内分泌科门诊	GLU:7.9 HbA1C:7.1 UA:343.0 CHOL:6.82 TG:7.62 HDL:0.85 LDL:2.61	2型糖尿病,高脂血症
2022-10-13	49				男	45	内分泌科门诊	GLU:7.8 HbA1C:6.5 UA:324.0 CHOL:5.84 TG:3.15 HDL:0.86 LDL:3.46	2型糖尿病,原发性高血压,高脂血症
2022-10-13	52				女	41	内分泌科门诊	GLU:18.2 HbA1C:13.7 UA:276.0 CHOL:7.73 TG:1.79 HDL:1.22 LDL:5.69	2型糖尿病
2022-10-13	53				男	39	内分泌科门诊	GLU:6.1 HbA1C:5.4 UA:419.0 CHOL:4.67 TG:1.73 HDL:0.78 LDL:3.31	2型糖尿病
2022-10-13	54				男	47	内分泌科门诊	GLU:14.5 HbA1C:10.4 UA:403.0 CHOL:5.91 TG:3.82 HDL:0.85 LDL:3.77	2型糖尿病
2022-10-13	56				男	53	内分泌科门诊	GLU:15.0 HbA1C:11.9 UA:248.0 CHOL:6.20 TG:1.50 HDL:0.89 LDL:5.08	2型糖尿病,原发性高血压,高脂血症,右侧小腿,软组织疾患，其他特指的
10月14-20	4				男	47	甲乳外科门诊	GLU:10.9 HbA1C: UA:333.0 CHOL:6.35 TG:1.37 HDL:0.93 LDL:4.97	糖尿病不伴有并发症,皮疹
10月14-20	6				男	47	心血管内科	GLU:5.9 HbA1C: UA:379.0 CHOL:5.69 TG:1.15 HDL:1.13 LDL:3.77	2型糖尿病,心房颤动,高脂血症
10月14-20	18				男	40	内分泌科门诊	GLU:8.5 HbA1C:7.8 UA:250.0 CHOL:5.37 TG:1.67 HDL:0.89 LDL:3.23	2型糖尿病,高脂血症
10月14-20	19				男	29	内分泌科门诊	GLU:14.0 HbA1C:8.6 UA:282.0 CHOL:5.99 TG:1.87 HDL:0.83 LDL:4.36	2型糖尿病
10月14-20	30				女	65	内分泌科门诊	GLU:8.5 HbA1C:8.3 UA:286.0 CHOL:5.55 TG:1.20 HDL:1.38 LDL:3.43	2型糖尿病
10月14-20	44				女	63	内分泌科	GLU:9.0 HbA1C:8.2 UA:286.0 CHOL:4.64 TG:1.75 HDL:0.80 LDL:2.99	2型糖尿病
10月14-20	47				女	53	肾内科	GLU:8.0 HbA1C: UA:322.0 CHOL:4.16 TG:1.85 HDL:0.82 LDL:2.42	2型糖尿病伴有多个并发症
10月14-20	49				男	47	胃肠外科	GLU:9.2 HbA1C:7.3 UA:426.0 CHOL:5.99 TG:1.67 HDL:1.05 LDL:4.13	2型糖尿病
10月14-20	51				男	55	心血管内科	GLU:6.9 HbA1C:6.2 UA:425.0 CHOL:3.86 TG:1.77 HDL:1.01 LDL:2.30	原发性高血压,糖尿病不伴有并发症,睡眠障碍,其他的
10月14-20	53				男	52	内分泌科门诊	GLU:6.6 HbA1C:7.3 UA:378.0 CHOL:3.98 TG:2.04 HDL:0.84 LDL:2.48	原发性高血压,2型糖尿病,高脂血症
10月14-20	57				男	34	消化内科门诊	GLU:10.4 HbA1C:7.1 UA:221.0 CHOL:4.69 TG:18.76 HDL:0.51 LDL:0.98	急性胰腺炎,2型糖尿病,高脂血症
10月14-20	60				女	54	内分泌科	GLU:9.0 HbA1C:9.9 UA:299.0 CHOL:4.71 TG:1.74 HDL:0.65 LDL:3.15	2型糖尿病
10月14-20	63				男	61	全科医学科	GLU:6.8 HbA1C:7.6 UA:287.0 CHOL:4.82 TG:1.20 HDL:0.94 LDL:3.53	静脉曲张,2型糖尿病
10月14-20	70				男	44	心血管内科	GLU: HbA1C:7.2 UA:367.0 CHOL:3.57 TG:2.16 HDL:0.78 LDL:1.92	糖尿病伴有并发症,冠状动脉粥样硬化性心脏病,慢性左心功能不全
10月14-20	72				女	60	内分泌科门诊	GLU:6.3 HbA1C:6.1 UA:304.0 CHOL:5.37 TG:1.24 HDL:1.14 LDL:3.56	2型糖尿病
2022-11-23					男	36		GLU:13.5 HbA1C:12.1 UA:209.0 CHOL:6.29 TG:6.70 HDL:0.54 LDL:2.73	2型糖尿病1、2型糖尿病大血管并发症 2、高血压病3级（极高危） 3、高脂血症 4、肝功能异常 5、单纯性脂肪肝 6、胆囊结石
2023.3.4	6				男	51		GLU:15.2 HbA1C:15.3 UA:311.0 CHOL:7.29 TG:3.78 HDL:0.65 LDL:4.46	2型糖尿病,高脂血症
2023.3.4	7				女	44		GLU:6.5 HbA1C:6.0 UA:290.0 CHOL:5.09 TG:0.97 HDL:1.01 LDL:3.59	甲状腺功能减退症,2型糖尿病,高脂血症
2023.3.4	10				男	52		GLU:20.5 HbA1C:11.6 UA:328.0 CHOL:6.80 TG:3.87 HDL:0.84 LDL:3.82	2型糖尿病,高脂血症
2023.3.4	24				男	55		GLU:9.3 HbA1C:9.0 UA:266.0 CHOL:5.77 TG:1.64 HDL:0.98 LDL:4.55	2型糖尿病性周围神经病,原发性高血压,高脂血症,高尿酸血症
2023.3.13	32				男	37		GLU:7.1 HbA1C:6.3 UA:254.0 CHOL:3.67 TG:2.80 HDL:0.68 LDL:1.80	2型糖尿病,高脂血症
2023.3.16	37				女	70		GLU:9.1 HbA1C:7.2 UA:351.0 CHOL:6.03 TG:2.02 HDL:0.79 LDL:4.21	2型糖尿病,睡眠障碍,原发性高血压
2023.3.16	38				男	57		GLU:15.6 HbA1C:11.6 UA:281.0 CHOL:6.60 TG:1.58 HDL:0.89 LDL:5.33	2型糖尿病
2023.3.16	39				男	50		GLU:14.6 HbA1C:12.3 UA:210.0 CHOL:4.86 TG:1.14 HDL:1.00 LDL:3.53	原发性高血压,动脉的动脉粥样硬化，其他的,糖尿病
2023.3.16	52				男	59		GLU:5.1 HbA1C:5.5 UA:426.0 CHOL:3.36 TG:3.35 HDL:0.75 LDL:1.40	高尿酸血症,睡眠障碍,原发性高血压,糖尿病,蛋白尿,过敏性皮炎,肺肾两虚证
2023.3.16	61				男	43		GLU:9.4 HbA1C: UA:416.0 CHOL:5.83 TG:2.56 HDL:0.89 LDL:3.59	原发性高血压,高脂血症,糖尿病,动脉的动脉粥样硬化，其他的
2023.3.16	62				女	61		GLU:7.0 HbA1C:6.8 UA:267.0 CHOL:3.45 TG:2.13 HDL:1.03 LDL:1.47	高脂血症,高尿酸血症,原发性高血压,冠状动脉粥样硬化,慢性肾脏病2期,上呼吸道感染,糖尿病
3023.3.21	76				女	36		GLU:17.9 HbA1C:13.1 UA:354.0 CHOL:7.01 TG:1.46 HDL:1.26 LDL:4.82	2型糖尿病,糖尿病伴有多个并发症
3023.3.21	88				女	56		GLU:7.0 HbA1C:7.2 UA:278.0 CHOL:5.07 TG:0.55 HDL:1.03 LDL:3.65	2型糖尿病,高脂血症,睡眠障碍,其他的,肝阳上亢证,瘀血痹阻证
3023.3.21	93				男	82		GLU:14.7 HbA1C: UA:367.0 CHOL:3.28 TG:3.50 HDL:0.53 LDL:1.45	2型糖尿病伴有多个并发症 糖尿病并肾脏疾病 糖尿病大血管并发症 2、慢性肾脏病3期 3、高血压2级 很高危 4、高尿酸血症 5、帕金森综合征 6、冠状动脉粥样硬化性心脏病 PCI术后 7、肺结节 8、高同型半胱氨酸血症 9、双侧颈动脉粥样硬化 10、双下肢动脉粥样硬化 11、睡眠障碍 12、老年瘙痒症 13、脂溢性角化病
2023.3.23	96				男	43		HbA1C:11.9 UA:189.0 CHOL:5.53 TG:1.87 HDL:0.89 LDL:4.03	2型糖尿病性周围神经病,高脂血症
2023.3.23	101				男	52		GLU:9.0 HbA1C:8.6 UA:260.0 CHOL:4.19 TG:4.90 HDL:0.58 LDL:1.81	2型糖尿病,高血压病2级（极高危）,高脂血症
2023.3.23	104				女	58		GLU:10.9 HbA1C:8.2 UA:337.0 CHOL:7.64 TG:2.37 HDL:1.38 LDL:5.27	原发性高血压,动脉的动脉粥样硬化，其他的,高脂血症,糖尿病,高黏滞血症
2023.3.23	110				男	64		GLU:9.6 HbA1C:9.9 UA:374.0 CHOL:6.96 TG:1.69 HDL:0.93 LDL:5.14	2型糖尿病,高脂血症
2023.3.25	117				女	62		GLU:9.5 HbA1C:8.8 UA:225.0 CHOL:3.89 TG:2.27 HDL:0.83 LDL:1.99	2型糖尿病,原发性高血压,头晕,动脉粥样硬化,高脂血症,寒邪外感证,瘀血阻滞证
2023.3.29	119				男	62		GLU:13.7 HbA1C:12.6 UA:405.0 CHOL:5.52 TG:5.37 HDL:0.69 LDL:2.47	发现体重减轻2月余，血糖升高4天
2023.3.29	120				女	60		GLU:7.9 HbA1C:7.4 UA:307.0 CHOL:5.34 TG:1.28 HDL:1.36 LDL:3.16	2型糖尿病性周围神经病
2022-10-10	13				男	38	老年医学科	GLU: HbA1C:11.1 UA:301.8 CHOL:5.10 TG:1.48 HDL:0.74 LDL:3.61	2型糖尿病,便秘
2022-10-10	20				男	44	内分泌科门诊	GLU:7.05 HbA1C: UA:296.0 CHOL:5.02 TG:2.64 HDL:0.92 LDL:2.73	2型糖尿病,高脂血症,别嘌呤醇过敏个人史,痛风性关节炎,肝功能检查的异常结果
2022-10-13	44				男	63	内分泌科门诊	GLU:7.2 HbA1C:7.0 UA:310.5 CHOL:4.73 TG:2.17 HDL:0.93 LDL:3.18	2型糖尿病
2022-10-13	48				男	56	内分泌科门诊	GLU:6.9 HbA1C:7.6 UA:342.9 CHOL:5.56 TG:0.93 HDL:1.22 LDL:3.88	糖尿病,肝功能检查的异常结果
2023.4.20	148				男	54		GLU:7.7 HbA1C:8.7 UA:412 CHOL:6.61 TG:0.04 HDL:0.94 LDL:4.92	糖尿病伴有并发症,原发性高血压,高脂血症,高尿酸血症
2023.7.26	183				男	46		Ｇlu:6.4HbA1C:6.9UA:330CHOL:4.18TG:1.71HDL:0.983LDL:2.46	2型糖尿病,高脂血症
2023.8.9	200				男	46		GLU:13.3 HbA1C:10.8 UA:299 CHOL:7.25 TG:8.41 HDL:1.04 LDL:3.55	1.2型糖尿病 2.肾上腺结节 3.高脂血症
	201				男	68		Ｇlu:7.7HbA1C:8.2UA:258CHOL:5.69TG:1.25 HDL:0.83LDL:4.78	高脂血症、冠状动脉粥样硬化、2型糖尿病
	208				女	69		Ｇlu:11.3HbA1C:9.6UA:314CHOL:7.23TG:2.42 HDL:0.98LDL:4.83	2型糖尿病
	210				女	73		Ｇlu:15.7HbA1C:11.0UA:357CHOL:4.06TG:1.91 HDL:1.09LDL:1.95	2型糖尿病,原发性高血压,高脂血症
	212				女	49		Ｇlu:19.1HbA1C:11.2UA:284CHOL:5.28TG:1.56 HDL:0.97LDL:3.85	1、2型糖尿病 2、高脂血症 3、骨质疏松
	213				男	60		Ｇlu:6.0HbA1C:6.2UA:257CHOL:3.08TG:1.84 HDL:0.91LDL:1.45	2型糖尿病,高脂血症
2023.8.15	232				男	59		GLU:16.8 HbA1C: UA:290 CHOL: 7.22TG:2.25 HDL: 1.10LDL:5.27	2型糖尿病,周围性面神经麻痹,高脂血症
	235				男	38		GLU:13.0 HbA1C:9.9 UA:306 CHOL:6.33 TG:4.92 HDL:0.98 LDL:3.53	糖尿病伴有并发症,高脂血症,原发性高血压,扩张型心肌病
	241				男	31		GLU:5.3 HbA1C:12.2 UA:294 CHOL:5.71 TG:3.13 HDL:0.60 LDL:3.60	1、2型糖尿病 2、高脂血症 3、骨质疏松
2023.8.17	256				男	38		Ｇlu:7.1HbA1C:6.1UA:376CHOL:3.45TG:1.92 HDL:0.88LDL:1.92	2型糖尿病,高脂血症
	257				男	59		Ｇlu:11.7HbA1C:13.1UA:290CHOL:7.22TG:2.25 HDL:1.10LDL:5.27	1、2型糖尿病 2、高脂血症 3、高血压？ 4、周围性面神经麻痹
	261				男	60		Ｇlu:8.3HbA1C:6.1UA:338CHOL:3.87TG:3.81 HDL:1.08LDL:1.48	高脂血症,动脉的动脉粥样硬化，其他的,慢性胃炎,骨质疏松,糖尿病,脂肪肝
	263				女	50		Ｇlu:8.1HbA1C:7.8UA:263CHOL:7.58TG:6.88HDL:0.75LDL:2.87	糖尿病,高脂血症
	266				女	68		Ｇlu:17.4HbA1C:12.0UA:296CHOL:7.7TG:1.68 HDL:1.04LDL:5.39	2型糖尿病,高脂血症
	269				女	60		Ｇlu:7.9HbA1C:6.5UA:329CHOL:3.99TG:1.82 HDL:0.72LDL:2.53	2型糖尿病,原发性高血压,高脂血症
	270				女	41		Ｇlu:7.1HbA1C:6.6UA:280CHOL:7.21TG:6.77 HDL:0.91LDL:3.99	2型糖尿病,高脂血症,肝阳上亢证
	271				男	54		Ｇlu:15.5HbA1C:8.5UA:335CHOL:5.1TG:1.88 HDL:0.93LDL:3.46	2型糖尿病,高脂血症
2023.8.25	273				男	38		GLU:6.2 HbA1C:9.4 UA:352 CHOL:4.69 TG:2.78 HDL:0.89 LDL:2.75	2型糖尿病
	276				男	54		GLU:9.0 HbA1C:7.3 UA:289 CHOL:4.29 TG:2.84 HDL:0.83 LDL:2.17	2型糖尿病性周围神经病,高脂血症,白细胞减少,血热瘀滞证
	278				男	49		GLU:8.0 HbA1C:6.7 UA:362 CHOL:4.12 TG:3.0 HDL:0.93 LDL:2.12	2型糖尿病,高脂血症,痰结血瘀证,脾虚证
	280				男	59		Ｇlu:5.8HbA1C:5.7UA:188CHOL:6.22TG:0.93 HDL:1.37LDL:4.55	2型糖尿病,高脂血症
2023.9.6	285				女	45		Ｇlu:6.0HbA1C:6.1UA:325CHOL:6.58TG:3.38 HDL:1.07LDL:4.1	高脂血症,糖尿病,高黏滞血症
	290				男	39		Ｇlu:18.5HbA1C:14.0UA:340CHOL:5.76TG:2.63 HDL:0.83LDL:3.76	2型糖尿病,高脂血症
	292				女	59		Ｇlu:6.9HbA1C:6.5UA:319CHOL:4.05TG:2.27 HDL:0.68LDL:2.17	原发性高血压,糖尿病,颈椎病,颈动脉硬化,高黏滞血症,瘀血阻络证,肝阳上亢证,高尿酸血症
	294				男	46		Ｇlu:9.6HbA1C:9.1UA:377CHOL:4.29TG:02.26 HDL:0.68LDL:2.32	原发性高血压,高脂血症,2型糖尿病
	303				女	55		HbA1C:7.0UA:235CHOL:5.97TG:0.74 HDL:0.98LDL:4.82	高脂血症,2型糖尿病,绝经期和女性更年期状态,维生素D缺乏病
	305				男	60		Ｇlu:6.9HbA1C:6.8UA:357CHOL:5.49TG:1.14 HDL:1.06LDL:4.0	2型糖尿病,高脂血症,颈动脉硬化
2023.9.8	310				男	45		GLU:6.5 HbA1C:6.4 UA268 CHOL:4.99 TG:2.04 HDL:1.19 LDL:3.28	2型糖尿病,高脂血症,维生素D缺乏病,原发性高血压
	311				男	43		GLU:6.2 HbA1C:6.4 UA:285 CHOL:4.98 TG:11.02 HDL:0.79 LDL:2.06	2型糖尿病,高脂血症,2型糖尿病性周围神经病
	312				男	55		GLU:5.5 HbA1C:5.9 UA:423 CHOL:2.88 TG:1.88 HDL:0.59 LDL:1.49	2型糖尿病,冠状动脉粥样硬化性心脏病,高脂血症,高尿酸血症,颈动脉硬化
	316				男	53		GLU:10.3 HbA1C:7.6 UA:353 CHOL:4.82 TG:5.54 HDL:0.98 LDL:1.63	2型糖尿病,原发性高血压,高脂血症
	321				男	56		GLU:6.8 UA:354 CHOL:7.51 TG:3.38 HDL:0.96 LDL:5.15	2型糖尿病,高脂血症
	325				男	57		GLU:18.1 HbA1C:9.9 UA:342 CHOL:4.54 TG:2.07 HDL:0.89 LDL:2.89	2型糖尿病,高脂血症
	327				女	53		GLU:6.5 HbA1C:6.2 UA:346 CHOL:5.53 TG:1.88 HDL:0.89 LDL:3.86	2型糖尿病
	328				男	56		GLU:16.7 HbA1C:13.6 UA:308 CHOL:5.35 TG:3.25 HDL:0.69 LDL:3.04	2型糖尿病,高脂血症
	331				女	61		GLU:6.6 HbA1C:6.5 UA:308 CHOL:4.1 TG:2.7 HDL:1.17 LDL:1.88	高脂血症,高尿酸血症,原发性高血压,慢性肾脏病3期,2型糖尿病,肺肾两虚证
2023.9.11	337				男	55		GLU:9.2 HbA1C:13.7 UA:403 CHOL:5.34 TG:1.44 HDL:0.7 LDL:4.28	2型糖尿病

## Sheet: T2DM+高尿酸血症+高脂血症
	糖尿病血浆标本信息
样本日期	序号	检验号	登记号	姓名	性别	年龄	科室	结果	诊断
2022-10-07	9				男	31	内分泌科门诊	GLU:10.4 HbA1C:10.6 UA:463.0 CHOL:7.29 TG:2.45 HDL:0.56 LDL:5.79	糖尿病,高血压2级
2022-10-10	14				女	66	内分泌科门诊	GLU:8.3 HbA1C:8.0 UA:418.0 CHOL:4.81 TG:2.06 HDL:0.86 LDL:2.82	2型糖尿病
2022-10-10	28				男	44	内分泌科门诊	GLU:12.3 HbA1C:9.2 UA:604.0 CHOL:5.56 TG:2.55 HDL:0.99 LDL:3.15	2型糖尿病,高尿酸血症,高脂血症
2022-10-10	30				女	43	老年医学科	GLU:18.9 HbA1C:10.6 UA:407.0 CHOL:7.22 TG:6.39 HDL:1.03 LDL:3.70	2型糖尿病
2022-10-10	43				女	65	内分泌科门诊	GLU:12.3 HbA1C:8.1 UA:407.0 CHOL:4.46 TG:2.86 HDL:0.93 LDL:2.48	2型糖尿病,高脂血症
2022-10-10	46				女	68	内分泌科门诊	GLU:6.8 HbA1C:6.2 UA:376.0 CHOL:6.12 TG:1.80 HDL:0.90 LDL:4.58	2型糖尿病,原发性高血压
2022-10-10	47				女	53	内分泌科门诊	GLU:18.2 HbA1C:10.7 UA:437.0 CHOL:5.47 TG:3.57 HDL:0.75 LDL:3.19	2型糖尿病
2022-10-10	48				男	51	综合内科门诊	GLU:7.1 HbA1C:6.1 UA:646.0 CHOL:4.38 TG:2.43 HDL:0.61 LDL:2.63	2型糖尿病,肝血管瘤
2022-10-10	68				男	59	内分泌科门诊	GLU:10.8 HbA1C:6.9 UA:518.0 CHOL:3.87 TG:1.71 HDL:0.61 LDL:2.65	2型糖尿病,原发性高血压,高脂血症,干眼,睡眠障碍,肝功能检查的异常结果
2022-10-10	71				女	59	健康管理科门诊	GLU:7.7 HbA1C: UA:593.0 CHOL:7.97 TG:1.37 HDL:1.07 LDL:6.19	体检
2022-10-13	24				女	62	内分泌科门诊	GLU:6.7 HbA1C:6.9 UA:451.0 CHOL:4.11 TG:1.91 HDL:0.92 LDL:2.26	2型糖尿病,高脂血症
2022-10-13	30				男	36	内分泌科门诊	GLU:7.5 HbA1C:7.7 UA:636.0 CHOL:7.09 TG:2.31 HDL:1.02 LDL:5.35	2型糖尿病
2022-10-13	31				男	47	健康管理科门诊	GLU:6.2 HbA1C:7.2 UA:631.0 CHOL:1.77 TG:1.78 HDL:0.46 LDL:0.72	2型糖尿病,甲状腺功能减退症,高尿酸血症,干燥综合征[舍格伦]
2022-10-13	45				女	72	内分泌科门诊	GLU:8.0 HbA1C:6.5 UA:373.0 CHOL:5.76 TG:2.26 HDL:1.06 LDL:3.52	2型糖尿病,高脂血症,高尿酸血症
2022-10-13	50				男	43	内分泌科门诊	GLU:13.8 HbA1C:9.9 UA:635.0 CHOL:4.43 TG:3.06 HDL:0.71 LDL:2.57	糖尿病
10月14-20	2				女	76	全科医学科	GLU:7.3 HbA1C: UA:528.0 CHOL:5.18 TG:1.85 HDL:0.67 LDL:3.76	2型糖尿病
10月14-20	5				男	57	内分泌科门诊	GLU:8.2 HbA1C:6.5 UA:429.0 CHOL:4.35 TG:2.16 HDL:0.85 LDL:2.83	2型糖尿病,甲状腺功能减退症
10月14-20	16				女	68	内分泌科门诊	GLU:6.6 HbA1C:8.9 UA:409.0 CHOL:5.56 TG:2.12 HDL:1.18 LDL:3.23	2型糖尿病
10月14-20	17				女	64	内分泌科门诊	GLU:6.2 HbA1C:7.0 UA:423.0 CHOL:3.81 TG:2.02 HDL:0.86 LDL:2.14	2型糖尿病
10月14-20	27				女	78	内分泌科门诊	GLU:13.2 HbA1C:9.8 UA:402.0 CHOL:4.58 TG:3.05 HDL:0.93 LDL:2.29	2型糖尿病性周围神经病,原发性高血压,高脂血症,维生素缺乏病,消化不良
10月14-20	41				男	57	内分泌科门诊	GLU:14.9 HbA1C:11.2 UA:584.0 CHOL:10.27 TG:23.58 HDL:0.63 LDL:1.39	2型糖尿病
10月14-20	75				男	27	内分泌科门诊	GLU:5.2 HbA1C:5.5 UA:465.0 CHOL:6.35 TG:3.76 HDL:0.78 LDL:3.97	2型糖尿病
单纯糖尿病-22-11-10	4				女	64		GLU:16.1TC:7.3TG:2.19LDL:5.14UA:384	2型糖尿病
单纯糖尿病-22-11-10	6				女	57		GLU:15.8UA:388TC:5.52,TG:3.0LDL:3.36	2型糖尿病
单纯糖尿病-22-11-10	11				男	45		GLU:8.6TC:6.55TG:3.45LDL:4.64UA:534	2型糖尿病
单纯糖尿病-22-11-10	23				男	31		GLU:6.1UA:485LDL:3.39	2型糖尿病,蛋白尿，高血压1级
2022-11-23					女	60		GLU:8.5 HbA1C: UA:549.0 CHOL:5.95 TG:4.41 HDL:1.05 LDL:2.76	2型糖尿病
2023.3.4	11				女	82		GLU:12.5 HbA1C:11.4 UA:437.0 CHOL:3.19 TG:1.74 HDL:0.73 LDL:1.55	2型糖尿病,2型糖尿病伴有多个并发症,慢性肾脏病3期,冠状动脉粥样硬化性心脏病,高血压病3级（极高危）,胃溃疡,高尿酸血症,2型糖尿病伴有周围循环并发症,2型糖尿病性周围神经病,肺良性病变
2023.3.13	29				男	67		GLU: HbA1C:5.1 UA:515.0 CHOL:4.49 TG:2.29 HDL:0.73 LDL:3.10	2型糖尿病,冠状动脉粥样硬化性心脏病
2023.3.16	47				男	53		GLU:7.7 HbA1C: UA:482.0 CHOL:5.08 TG:1.21 HDL:0.81 LDL:3.82	2型糖尿病,高脂血症
2023.3.16	48				男	58		GLU:8.0 HbA1C:6.8 UA:476.0 CHOL:4.47 TG:0.58 HDL:0.93 LDL:3.38	2型糖尿病
2023.3.16	64				男	52		GLU:6.9 HbA1C:6.4 UA:532.0 CHOL:6.31 TG:2.55 HDL:0.92 LDL:3.99	2型糖尿病,高尿酸血症,高脂血症
3023.3.21	67				女	67		GLU:6.6 HbA1C:7.3 UA:359.0 CHOL:5.43 TG:1.11 HDL:1.37 LDL:3.26	原发性高血压,动脉的动脉粥样硬化，其他的,慢性肾脏病3期,糖尿病,肺肾两虚证
3023.3.21	71				男	62		GLU:6.6 HbA1C:6.2 UA:450.0 CHOL:4.09 TG:0.97 HDL:1.08 LDL:2.44	高尿酸血症,冠状动脉粥样硬化性心脏病,慢性胃炎,糖尿病,慢性肾脏病2期,肺肾两虚证
3023.3.21	81				男	53		GLU:9.0 HbA1C:7.3 UA:557.0 CHOL:5.21 TG:3.46 HDL:0.83 LDL:3.05	2型糖尿病
3023.3.21	84				男	39		GLU:6.3 HbA1C:5.9 UA:656.0 CHOL:5.27 TG:4.64 HDL:0.69 LDL:2.73	2型糖尿病,高脂血症,高尿酸血症,非酒精性脂肪性肝炎
3023.3.21	92				男	52		GLU:7.2 HbA1C:6.2 UA:592.0 CHOL:4.83 TG:1.91 HDL:0.95 LDL:2.82	2型糖尿病性肾病,高血压,高脂血症,脂肪肝,结肠息肉,慢性胃炎
2023.3.23	100				男	45		GLU: HbA1C:8.8 UA:454.0 CHOL:5.90 TG:1.33 HDL:0.88 LDL:4.41	2型糖尿病
2023.3.23	102				男	51		GLU:6.4 HbA1C:6.4 UA:529.0 CHOL:3.80 TG:3.17 HDL:0.81 LDL:1.75	原发性高血压,动脉的动脉粥样硬化，其他的,慢性肾脏病2期,糖尿病,高脂血症,高同型半胱氨酸血症,高尿酸血症,肺肾两虚证
2023.3.23	107				男	60		GLU:9.6 HbA1C:8.9 UA:566.0 CHOL:6.10 TG:2.12 HDL:0.82 LDL:4.20	2型糖尿病
2023.3.25	116				女	47		GLU:16.8 HbA1C: UA:403.0 CHOL:5.75 TG:2.37 HDL:0.88 LDL:3.89	2型糖尿病,高脂血症
2023.3.29	121				女	36		GLU:12.3 HbA1C:8.3% UA:403.0 CHOL:5.22 TG:1.91 HDL：0.53 LDL:3.86	2型糖尿病,肥胖症,缺铁性贫血,脂肪肝
2023.3.29	122				女	54		GLU:8.0 HbA1C:7.0 UA:399.0 CHOL:4.10 TG:2.15 HDL:0.83 LDL:2.22	2型糖尿病,高脂血症,原发性高血压,复杂性尿路感染
2022-10-13	3				男	33	内分泌科	GLU:18.6 HbA1C:12.9 UA:553.6 CHOL:5.25 TG:8.03 HDL:0.58 LDL:1.97	2型糖尿病
2022-10-13	8				男	55	全科医学科	GLU:7.6 HbA1C:7.1 UA:462.4 CHOL:4.64 TG:2.24 HDL:0.73 LDL:2.67	晕厥和虚脱,2型糖尿病
2023.4.17	131				男	42		GLU:6.2 HbA1C: UA:512 CHOL:4.87 TG:0.8 HDL:0.75 LDL:4.0	原发性高血压,冠状动脉粥样硬化,2型糖尿病,慢性肾功能不全,高尿酸血症,气滞血瘀证
2023.4.17	139				男	56		GLU:7.2HbA1C:7.7 UA:644 CHOL:5.71 TG:3.0 HDL:0.65 LDL:3.60	痛风,2型糖尿病,原发性高血压,高脂血症
2023.4.20	144				男	63		GLU:8.9HbA1C:8.2 UA:482 CHOL:3.76TG:4.39 HDL:0.69LDL:1.44	高血压2级,高脂血症,高尿酸血症,2型糖尿病,高黏滞血症,颈动脉硬化
2023.4.20	146				男	56		GLU:6.7 HbAC:5.7 UA:528 CHOL:5.2TG:0.92 HDL:1.4 LDL:3.43	2型糖尿病,痛风,高血压3级,颈动脉硬化,高黏滞血症,高尿酸血症
2023.4.20	149				女	42		GLU:6.6 HbA1C: UA:517 CHOL:4.23 TG:3.62 HDL:0..64LDL:2.21	2型糖尿病,高脂血症,高尿酸血症不伴有感染性关节炎体征和砂砾性病
2023.4.20	151				男	52		GLU:8.4 HbA1C:7.7 UA:612 CHOL: 4.91TG:1.76 HDL:0.89 LDL:2.99	2型糖尿病,高尿酸血症
2023.4.23	153				男	32		GLU:8.3 HbA1C:7.6 UA:446 CHOL:4.94 TG:1.16 HDL:0.83 LDL:3.69	脂肪肝,2型糖尿病,高尿酸血症,肝功能不全
	158				男	37		GLU: HbA1C:13.7 UA:620 CHOL:5.90 TG:3.79 HDL:0.72 LDL:4.17	2型糖尿病,高尿酸血症
2023.7.26	184				男	60		Ｇlu:10.6HbA1C:6.7UA:511CHOL:5.76TG:4.43 HDL:0.76LDL:2.34	高脂血症,冠状动脉粥样硬化,腰椎间盘突出,2型糖尿病,高尿酸血症
	185				男	58		Ｇlu:6.7HbA1C:7.1UA:492CHOL:5.18TG:0.97 HDL:1.10LDL:3.82	2型糖尿病,高脂血症,高尿酸血症
	186				男	64		Ｇlu:6.4HbA1C:6.7UA:450CHOL:4.93TG:0.85 HDL:0.92LDL:3.90	2型糖尿病,高脂血症,原发性高血压
	187				男	67		Ｇlu:8.2HbA1C:7.8UA:597CHOL:4.90TG:1.86 HDL:0.80LDL:3.55	2型糖尿病,高尿酸血症,颈动脉硬化,慢性肾脏病2期,原发性高血压
	189				男	49		Ｇlu:9.3HbA1C:8.4UA:503CHOL:3.66TG:1.98 HDL:0.98LDL:2.03	高脂血症,原发性高血压,2型糖尿病,冠状动脉粥样硬化性心脏病
	190				男	53		Ｇlu:8.4HbA1C:5.9UA:489CHOL:7.13TG:2.98 HDL:0.83LDL:5.55	糖尿病、高脂血症复诊
	191				女	59		Ｇlu:5.4HbA1C:6.7UA:442CHOL:7.44TG:2.65 HDL:0.88LDL:5.58	2型糖尿病,高脂血症,慢性肾脏病3期
	192				女	49		Ｇlu:14.7HbA1C:9.6UA:385CHOL:7.53TG:21.56 HDL:0.51LDL:1.18	2型糖尿病,高脂血症
	195				男	51		Ｇlu:7.9HbA1C:7.4UA:544CHOL:5.37TG:6.85 HDL:0.63LDL:1.92	2型糖尿病,高脂血症,高尿酸血症
	196				男	56		Ｇlu:7.4HbA1C:6.9UA:493CHOL:5.38TG:2.25 HDL:0.74LDL:4.02	2型糖尿病,高脂血症,高尿酸血症
2023.8.9	203				男	43		Ｇlu:HbA1C:UA:499CHOL:4.43TG:3.94 HDL:0.73LDL:2.55	2型糖尿病,特发性(原发性)高血压,高脂血症
	204				男	59		Ｇlu:8.5HbA1C:UA:497CHOL:4.71TG:1.92 HDL:1.14LDL:2.74	2型糖尿病、痛风性关节炎
	205				男	61		Ｇlu:6.5HbA1C:6.3UA:431CHOL:5.03TG:1.66 HDL:0.87LDL:3.78	2型糖尿病性周围神经病,2型糖尿病性周围血管病变,高脂血症,颈动脉硬化
	211				男	58		Ｇlu:7.4HbA1C:6.8UA:703CHOL:5.89TG:1.45HDL:0.88LDL:4.52	全身性骨关节炎,2型糖尿病,高尿酸血症
2023.8.10	217				男	41		GLU:6.4 HbA1C: UA:569 CHOL:4.71 TG:3.44 HDL:0.63 LDL:2.54	高脂血症,高尿酸血症,2型糖尿病,维生素D缺乏病
	222				女	36		Ｇlu:8.2HbA1C:7.7UA:457CHOL:4.8TG:1.52 HDL:0.84LDL:3.76	2型糖尿病,高脂血症,高尿酸血症不伴有感染性关节炎体征和砂砾性病
2023.8.15	234				男	46		GLU:9.0 HbA1C:8.5 UA:517 CHOL:2.63 TG:3.88 HDL:0.56 LDL:0.83	2型糖尿病大血管并发症 2、高血压病3级（极高危） 3、高脂血症 4、单纯性脂肪肝 5、胆囊结石
	236				男	33		GLU:16.3 HbA1C:13.3 UA:766 CHOL:7.51 TG:13.51 HDL:0.66 LDL:1.61	痛风性关节炎,2型糖尿病
2023.8.17	250				女	66		Ｇlu:8.1HbA1C:8.1UA:526CHOL:3.95TG:2.17 HDL:0.73LDL:2.75	1、2型糖尿病；2、脂肪肝
	253				女	78		Ｇlu:7.7HbA1C:7.0UA:488CHOL:6.99TG:1.47 HDL:0.86LDL:5.52	2型糖尿病,原发性高血压,高脂血症
	262				男	66		Ｇlu:13.6HbA1C:9.3UA:546CHOL:5.48TG:1.42 HDL:0.88LDL:4.38	2型糖尿病,原发性高血压
2023.8.25	281				男	69		Ｇlu:6.3HbA1C:5.6UA:454CHOL:2.82TG:2.36 HDL:0.66LDL:1.28	高尿酸血症,冠状动脉粥样硬化性心脏病,慢性胃炎,慢性肾功能不全,2型糖尿病,原发性高血压,高同型半胱氨酸血症
2023.9.6	286				女	83		Ｇlu:7.5UA:486CHOL:2.87TG:1.87 HDL:0.57LDL:1.43	2型糖尿病伴有周围循环并发症,轻度贫血,高尿酸血症,下肢动脉硬化闭塞症,痛风,高血压病3级（极高危）
	293				男	43		Ｇlu:6.5HbA1C:6.1UA:478CHOL:6.54TG:2.91 HDL1.05LDL:4.42	2型糖尿病,高脂血症,高尿酸血症
	295				女	47		Ｇlu:7.6HbA1C:7.7UA:430CHOL:4.05TG:2.75 HDL:0.93LDL:1.99	高同型半胱氨酸血症,高脂血症,原发性高血压,冠状动脉肌桥,糖尿病,颈动脉硬化
	298				女	51		Ｇlu:7.2HbA1C:7.6UA:431CHOL:5.86TG:2.82HDL:0.83LDL:3.51	2型糖尿病,高脂血症
	302				男	36		Ｇlu:6.5HbA1C:7.0UA:467CHOL:5.83TG:1.54 HDL:0.77LDL:4.22	糖尿病,高脂血症
	304				男	37		Ｇlu:15.2HbA1C:10.0UA:463CHOL:5.05TG:2.78 HDL:0.69LDL:3.26	糖尿病,高脂血症
	306				男	40		Ｇlu:7.1UA:485CHOL:5.32TG:2.46 HDL:0.58LDL:3.77	2型糖尿病,高脂血症,痛风
2023.9.8	314				男	70		GLU:5.4 HbA1C:5.7 UA:629 CHOL:4.77 TG:3.8HDL:0.59 LDL:1.9	2型糖尿病,高尿酸血症,高脂血症
	322				男	35		GLU:12.4 HbA1C:11.9 UA:513 CHOL:5.35 TG:3.59 HDL:0.68 LDL:3.32	2型糖尿病,高脂血症,高尿酸血症
	326				男	40		GLU:7.0 HbA1C:7.9 UA:604 CHOL:4.5 TG:2.13 HDL:0.58 LDL:3.01	高脂血症,糖尿病,高尿酸血症
2023.9.11	340				男	44		GLU:6.5 UA:526 CHOL:6.31 TG:2.24 HDL:0.63 LDL:4.75	2型糖尿病
	341				男	38		GLU:7.0 HbA1C:6.9 UA:607 CHOL:5.02 TG:3.22 HDL:0.88 LDL:2.95	2型糖尿病,高脂血症,高尿酸血症
	345				女	60		GLU:9.9 HbA1C:7.6 UA:408 CHOL:3.69 TG:2.71 HDL:0.63 LDL:2.03	高脂血症,高尿酸血症,原发性高血压,糖尿病
	346				女	40		GLU:6.3 HbA1C:6.6 UA:467 CHOL:5.55 TG:1.24 HDL:0.75 LDL:4.58	2型糖尿病,高脂血症,高尿酸血症
